# Supplementary material
Source: publisher figshare collection journal article supplement (https://acs.figshare.com/ndownloader/files/4566898)
Supplement: Supplementary file 1 [file 4566898]

# Highly Z- and Enantioselective Ring-Opening/Cross-Metathesis Reactions Catalyzed by Stereogenic-at-Mo Adamantylimido Complexes

Ismail Ibrahim,<sup>†</sup> Miao Yu,<sup>†</sup> Richard R. Schrock,<sup>‡</sup> and Amir H. Hoveyda<sup>†,\*</sup>

<sup>†</sup>*Department of Chemistry, Merkert Chemistry Center, Boston College, Chestnut Hill, Massachusetts 02467,*

<sup>‡</sup>*Department of Chemistry, Massachusetts Institute of Technology, Cambridge, Massachusetts 02139*

## SUPPORTING INFORMATION, PART A

**General.** Infrared (IR) spectra were recorded on a Bruker FTIR Alpha (ATR Mode) spectrometer,  $\nu_{\text{max}}$  in  $\text{cm}^{-1}$ . Bands are characterized as broad (br), strong (s), medium (m), or weak (w).  $^1\text{H}$  NMR spectra were recorded on a Varian Unity INOVA 400 (400 MHz) spectrometer. Chemical shifts are reported in ppm from tetramethylsilane with the solvent resonance resulting from incomplete deuterium incorporation as the internal standard ( $\text{CDCl}_3$ :  $\delta$  7.26 ppm,  $\text{C}_6\text{D}_6$ :  $\delta$  7.16 ppm). Data are reported as follows: chemical shift, integration, multiplicity (s = singlet, d = doublet, q = quartet, br = broad, m = multiplet), and coupling constants (Hz).  $^{13}\text{C}$  NMR spectra were recorded on a Varian Unity INOVA 400 (100 MHz) spectrometer with complete proton decoupling. Chemical shifts are reported in ppm from tetramethylsilane with the solvent resonance as the internal standard ( $\text{CDCl}_3$ :  $\delta$  77.26 ppm). High-resolution mass spectrometry was performed on a Micromass LCT ESI-MS (positive mode) at the Boston College Mass Spectrometry Facility. Enantiomer ratios were determined by HPLC (Chiral Technologies Chiralpak OD, OJ-H, AS column or Chiralcel OD-R column Boston College (4.6 mm x 250 mm)) in comparison with authentic racemic materials. Optical rotations were measured on a Rudolph Research Analytical Autopol IV Polarimeter. A CIF file of the X-ray structure on page is SI-21 attached.

Unless otherwise noted, all reactions were performed with distilled and degassed solvents under an atmosphere of dry  $\text{N}_2$  in oven- (135 °C) or flame-dried glassware with standard dry box or vacuum line techniques. Oxabicycles were prepared according to previously published procedures<sup>1</sup> and dried by azeotropic distillation with  $\text{C}_6\text{H}_6$  prior to use in reactions with Mo-based complexes. Styrene (Aldrich), *p*-methoxystyrene (Acros), *p*-trifluoromethylstyrene (Aldrich), *o*-methylstyrene (Fluka) and *o*-bromostyrene (Aldrich), were dried by distillation from  $\text{CaH}_2$  under  $\text{N}_2$  prior to use.

**Solvents:** Solvents were purged with argon and purified under a positive pressure of dry Ar by a modified Innovative Technologies purification system. Toluene (Doe & Ingalls), and benzene (Aldrich) were passed successively through activated copper and alumina columns. Tetrahydrofuran was purified by distillation from sodium benzophenone ketyl immediately prior to use. All work-up and purification procedures were carried out with reagent grade solvents (purchased from Doe & Ingalls) under air atmosphere.

---

(1) Hoffman, H. M. R.; Kim, H. *Eur. J. Org. Chem.* **2000**, 2195–2201

**Metal-based Complexes:** Mo bispyrrolide complexes **1a-1b**<sup>2</sup> and Mo monoaryloxides **3a, 3b, 3c** were synthesized according to previously disclosed procedures.<sup>3</sup> Alkylidenes **5a, 5b, 5c** and **5d** were synthesized based on the general protocols described below (procedure A). All Mo complexes were handled under an inert atmosphere of N<sub>2</sub> in a dry box.

**d<sub>6</sub>-Benzene** was purchased from Cambridge Isotope Laboratories and distilled over Na into activated 4 Å molecular sieves prior to use.

**Tetrabutylammonium fluoride, 1.0 M solution in tetrahydrofuran** was purchased from Aldrich and used as received.

### Preparation of Monoaryloxide Mo Complexes

**General Precedure:** In an N<sub>2</sub>-filled glovebox, a 4-mL vial with magnetic stir bar was charged with **1b** (8.6 mg, 15.2 μmol), **2a** (7.2 mg, 15.2 μmol), and C<sub>6</sub>D<sub>6</sub> (760 μL). The vial was tightly capped and the mixture was allowed to stir for 1 hour, at which time it was transferred to an NMR tube (screw cap NMR) by a pipette. The NMR tube was capped and sealed with Teflon tape. (Please note that for *in situ*-generated complexes, only the diagnostic signals of the α-carbon of the *syn*-alkylidenes are reported. <sup>1</sup>H NMR (400 MHz, C<sub>6</sub>D<sub>6</sub>): δ 12.94 (1H, s), 12.74 (1H, s), 12.46 (1H, s), 12.38 (1H, s); dr = 3:1 (entry 1, Table 1). <sup>1</sup>H NMR data are summarized in Table 1 (see manuscript text).

**Representative procedure for preparation of Mo complex 5b (used *in situ*):** In an N<sub>2</sub>-filled glovebox, a 4-mL vial containing a magnetic stir bar was charged with **1b** (6.0 mg, 10.5 μmol), **2b** (6.0 mg, 10.5 μmol), and C<sub>6</sub>H<sub>6</sub> (500 μL, 0.02 M), causing the mixture to turn orange. The vial was capped and the mixture was allowed to stir for 1 hour at 22 °C, after which the catalyst solution was transferred to the reaction mixture by a syringe (dried at 65 °C under vacuum).

**General Procedure for Catalytic Enantioselective Ring-Opening/Cross-Metathesis (ROCM) Reactions with *in situ*-Generated Catalyst:** In an N<sub>2</sub>-filled glovebox, an oven-dried 4-mL vial with a magnetic stir bar was charged with the appropriate amount of the chiral complex in C<sub>6</sub>H<sub>6</sub> (or toluene), prepared as mentioned above, and the cross partner. The resulting mixture was allowed to stir for 3-4 min, and added by syringe to a solution of the oxabicyclo in C<sub>6</sub>H<sub>6</sub> (or toluene) in an oven-dried 4-mL vial. The resulting solution was allowed to stir for the required period of time. The reaction was then quenched by exposure to air and concentrated *in vacuo* (percent conversion determined by 400 MHz <sup>1</sup>H NMR analysis). Purification was performed by silica gel chromatography. Enantiomeric purity of the product was determined by HPLC analysis.

---

(2) (a) Hock, A. S.; Schrock, R. R.; Hoveyda, A. H. *J. Am. Chem. Soc.* **2006**, *128*, 16373–16375. (b) Singh, R.; Czekelius, C.; Schrock, R. R.; Müller, P. M.; Hoveyda, A. H. *Organometallics* **2007**, *26*, 2528–2539.

(3) Malcolmson, S. J.; Meek, S. J.; Sattely, E. S.; Schrock, R. R.; Hoveyda, A. H. *Nature* **2008**, *456*, 933–937. (b) Sattely, S. E.; Meek, S. J.; Malcolmson, S. J.; Schrock, R. R.; Hoveyda, A. H. *J. Am. Chem. Soc.*, ASAP.

**Representative Procedure for Desilylation with *n*-Tetrabutylammonium Fluoride (TBAF):** Silyl ether **6a** (0.035 mmol, 12.0 mg) was dissolved in 2.0 mL distilled THF. 1.0 M TBAF in THF (20.0 equiv. 0.7 mmol, 200  $\mu$ L) was added and the mixture was allowed to stir at 22 °C for 6-8 h. The mixture was concentrated *in vacuo* and the residue purified by silica gel chromatography (1:1 hexanes:diethyl ether).

**Representative Procedure for Catalytic Enantioselective Ring-Opening/Cross-Metathesis Reactions with *in situ*-Generated Catalyst:** In an N<sub>2</sub>-filled glovebox, an oven-dried 4-mL vial with a magnetic stir bar was charged with (1 mol %) of *in situ*-generated complex **5b** (20.0  $\mu$ L, 0.02 M, 0.40  $\mu$ mol in C<sub>6</sub>H<sub>6</sub>), prepared as mentioned above, and 2.0 equivalent of styrene (10  $\mu$ L, 0.0832 mmol). The resulting mixture was allowed to stir for 3-4 min, and added by syringe to a solution of the oxabicyclo **4** (10.0 mg, 41.6  $\mu$ mol) in C<sub>6</sub>H<sub>6</sub> (190  $\mu$ L) in a 4-mL vial, (final substrate concentration = 0.2 M). The resulting solution was allowed to stir for 1 hour, after which the reaction was quenched through exposure of the solution to air. The mixture was concentrated *in vacuo* and conversion determined by 400 MHz <sup>1</sup>H NMR analysis. Purification of the resulting oil residue (typically light yellow) was performed by silica gel chromatography. Enantiomeric purity of **6a** was determined by HPLC analysis of the derived secondary alcohol in comparison with authentic racemic material.

***tert*-Butyldimethyl((2*S*,4*R*,6*R*)-2-*Z*-styryl-6-vinyltetrahydro-2*H*-pyran-4-yloxy)silane (6a)** (Table 1, entry 2). Following the aforementioned procedure, oxabicyclo **4** (10.0 mg, 41.6  $\mu$ mol) dissolved in C<sub>6</sub>H<sub>6</sub> (190  $\mu$ L) was treated with (1 mol %) of *in situ*-generated **5b** (20.0  $\mu$ L, 0.02 M, 0.40  $\mu$ mol) and styrene (10  $\mu$ L, 83.2  $\mu$ mol, 2.0 equiv; final substrate concentration = 0.2 M); the mixture was allowed to stir for 1 hour. The resulting brown oil was purified by silica gel chromatography (50:1 hexanes:diethyl ether) to afford **6a** (11.70 mg, 0.0340 mmol, 85.0% yield) as a colorless oil. **IR (neat):** 2949 (s), 2927 (s), 2855 (s), 1471 (m), 1376 (m), 1252 (m), 1064 (s), 909 (m), 834 (m), 773 (m), 733(m), 701 (m); **<sup>1</sup>H NMR (400 MHz, CDCl<sub>3</sub>):**  $\delta$  7.37-7.28 (m, 5H), 6.60 (d, *J* = 11.7 Hz, 1H), 5.92 (ddd, *J* = 17.3, 10.5, 5.7 Hz, 1H), 5.71 (dd, *J* = 11.6, 8.7 Hz, 1H), 5.30 (ddd, *J* = 17.2, 1.4, 1.4 Hz, 1H), 5.13 (ddd, *J* = 10.5, 1.3, 1.3 Hz, 1H), 4.26-4.19 (m, 1H), 3.92-3.86 (m, 1H), 3.82 (ddd, *J* = 15.5, 10.7, 4.5 Hz, 1H), 1.93-1.85 (m, 2H), 1.49 (m, 1H), 1.40 (m, 1H), 0.90 (s, 9H), 0.06 (s, 3H), 0.05 (s, 3H); **<sup>13</sup>C NMR (100 MHz, CDCl<sub>3</sub>):**  $\delta$  138.7, 137.1, 132.1, 132.0, 129.0, 128.5, 127.5, 115.6, 76.3, 72.3, 68.6, 41.8, 41.3, 26.1, 18.4, -4.3; **HRMS (ESI<sup>+</sup>) [M+H]<sup>+</sup>** calcd for C<sub>21</sub>H<sub>33</sub>O<sub>2</sub>Si: 345.2250, found: 345.2254; [ $\alpha$ ]<sub>D</sub><sup>20</sup> +51.2 (c = 0.375, CHCl<sub>3</sub>) for an enantiomerically enriched sample of 98.5:1.5 er (97% ee). Enantiomeric purity was determined by analysis of HPLC of the corresponding alcohol (after removal of the silyl group) in comparison with authentic racemic material.

**(2*S*,4*R*,6*R*)-2-*Z*-Styryl-6-vinyltetrahydro-2*H*-pyran-4-ol.** Following the aforementioned procedure, pyran **6a** was desilylated. **IR (neat):** 3374 (br), 3081 (w), 3018 (w), 2942 (m), 2918 (m), 2849 (m), 1647 (m), 1493 (w), 1447 (w), 1362 (m), 1303 (m), 1061(s), 988 (s), 773 (s), 693 (s); **<sup>1</sup>H NMR (400 MHz, CDCl<sub>3</sub>):**  $\delta$  7.36-7.20 (m, 5H), 6.60 (d, *J* = 11.7 Hz, 1H), 5.91(ddd, *J* =

17.3, 10.6, 5.6 Hz, 1H), 5.72 (dd,  $J = 11.6, 8.7$  Hz, 1H), 5.29 (ddd,  $J = 17.4, 1.5, 1.5$  Hz, 1H), 5.15 (ddd,  $J = 10.6, 1.5, 1.5$  Hz, 1H), 4.31-4.25 (m, 1H), 3.93-3.83 (m, 2H), 2.08-2.01 (m, 2H), 1.56 (br s, 1H), 1.50-1.30 (m, 2H);  $^{13}\text{C}$  NMR (100 MHz,  $\text{CDCl}_3$ ):  $\delta$  138.4, 137.0, 132.2, 131.8, 129.0, 128.5, 127.6, 115.8, 76.0, 72.3, 68.0, 41.2, 40.8; HRMS (ESI<sup>+</sup>)  $[\text{M}+\text{H}]^+$  calcd for  $\text{C}_{15}\text{H}_{19}\text{O}_2$ : 231.1385, found: 231.1391;  $[\alpha]_{\text{D}}^{20} +76.12$  ( $c = 0.375$ ,  $\text{CHCl}_3$ ) for an enantiomerically enriched sample of 98.5:1.5 er (97% ee). Enantiomeric purity was determined by HPLC analysis in comparison with authentic racemic material (OD column, 98/2 hexanes/*i*-PrOH, 1.0 mL/min, 254 nm;  $t_{\text{r}}$  (major enantiomer) = 23.16 min,  $t_{\text{r}}$  (minor enantiomer) = 19.51 min.

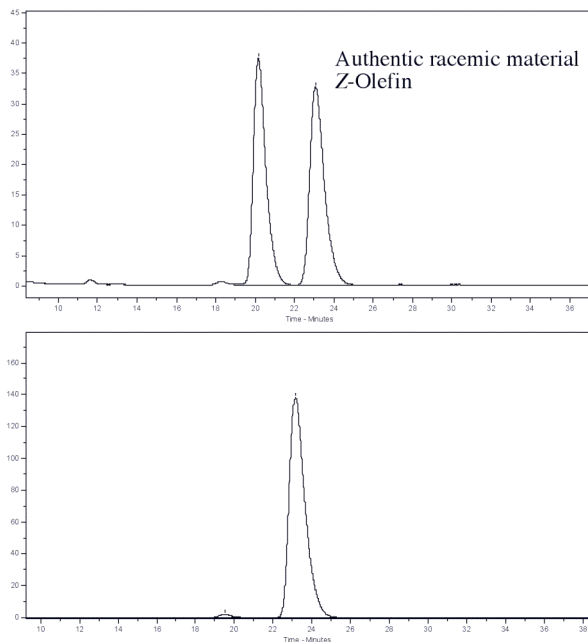

| # | time (min) | area    | area % | # | time (min) | area    | area % |
|---|------------|---------|--------|---|------------|---------|--------|
| 1 | 20.17      | 1680092 | 49.640 | 1 | 19.51      | 86557   | 1.108  |
| 2 | 23.07      | 1704467 | 50.360 | 2 | 23.16      | 7723354 | 98.892 |

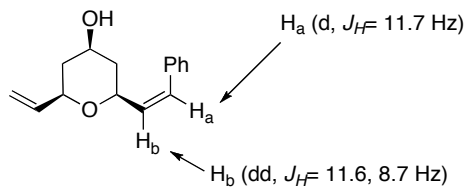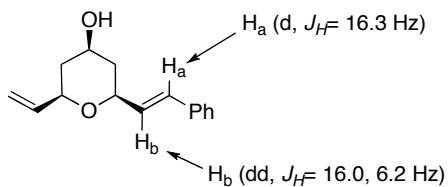

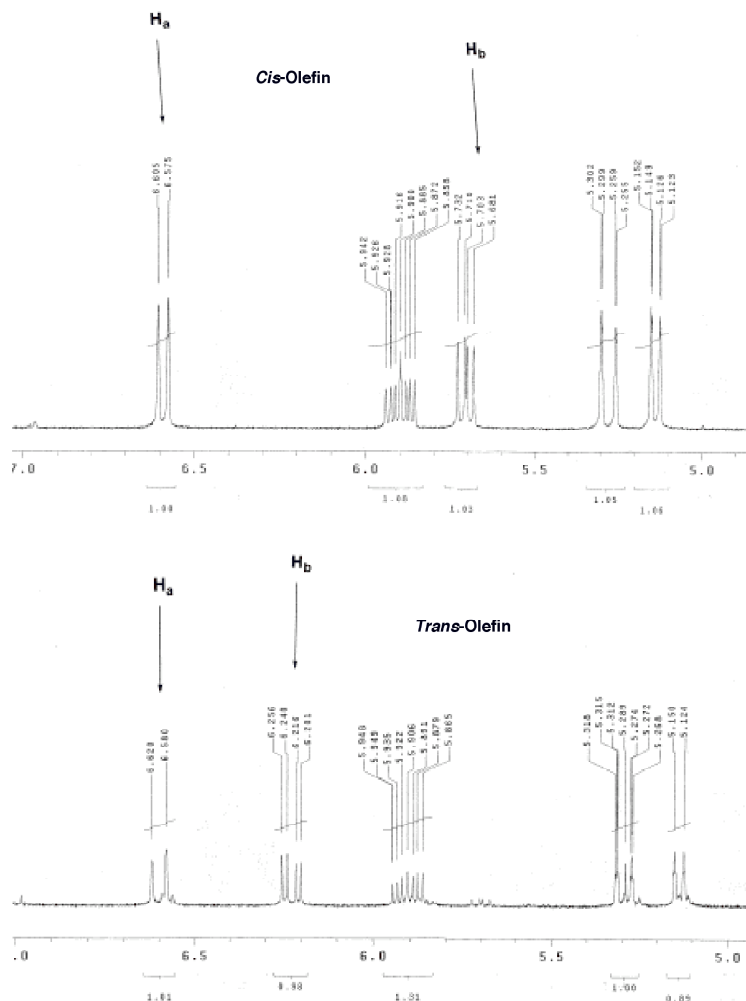

**tert-Butyl((2*S*,4*R*,6*R*)-2-*Z*-(4-methoxystyryl)-6-vinyltetrahydro-2*H*-pyran-4-yloxy)dimethylsilane (6b)** (Table 2, entry 1). Following the aforementioned procedure, oxabicyclo **4** (10.0 mg, 41.6  $\mu$ mol) was treated with *in situ*-generated **5b** (20.0  $\mu$ L, 0.02 M, 0.40  $\mu$ mol, neat) and *p*-methoxystyrene (11.0  $\mu$ L, 83.2  $\mu$ mol, 2.0 equiv); the mixture was allowed to stir for 0.5 h. The resulting oil was purified by silica gel chromatography (50:1 hexanes:diethyl ether) to afford **6b** (12.5 mg, 33.3  $\mu$ mol, 80.0% yield) as colorless oil. **IR** (neat): 2951 (s), 2929 (s), 2856 (s), 1462 (m), 1376 (m), 1250 (m), 1069 (s), 910 (m), 837 (m), 775 (m); **<sup>1</sup>H NMR** (400 MHz, CDCl<sub>3</sub>):  $\delta$  7.24 (d,  $J$  = 8.7 Hz, 2H), 6.88 (d,  $J$  = 8.7 Hz, 2H), 6.53 (d,  $J$  = 11.5 Hz, 1H), 5.91 (ddd,  $J$  = 17.2, 10.5, 5.8 Hz, 1H), 5.62 (dd,  $J$  = 11.6, 8.6 Hz, 1H), 5.29 (ddd,  $J$  = 17.2, 1.4, 1.4 Hz, 1H), 5.14 (ddd,  $J$  = 10.5, 1.3, 1.3 Hz, 1H), 4.25-4.18 (m, 1H), 3.93-3.88 (m, 1H), 3.87-3.84 (m, 1H), 3.82 (s, 3H), 1.94-1.86 (m, 2H), 1.49-1.40 (m, 2H), 0.90 (s, 9H), 0.07 (s, 3H), 0.06 (s, 3H); **<sup>13</sup>C NMR** (100 MHz, CDCl<sub>3</sub>):  $\delta$  159.1, 138.8, 132.0, 130.5, 130.4, 129.7, 115.6, 114.0, 76.3, 72.4, 68.6, 55.5, 41.8, 41.3, 26.1, 18.4, -4.3; **HRMS** (ESI<sup>+</sup>) [ $M+H$ ]<sup>+</sup> calcd for C<sub>22</sub>H<sub>35</sub>O<sub>3</sub>Si: 375.2355, found: 375.2339; [ $\alpha$ ]<sub>D</sub><sup>20</sup> +60.8 (c = 0.375, CHCl<sub>3</sub>) for an enantiomerically enriched sample of 97:3 er (94% ee). Enantiomeric purity was determined by analysis of HPLC of the

corresponding alcohol after removal of the silyl group, in comparison with authentic racemic material.

**(2*S*,4*R*,6*R*)-2-*Z*-(4-Methoxystyryl)-6-vinyltetrahydro-2*H*-pyran-4-ol.** Following the aforementioned procedure, pyran **6b** was desilylated. **IR (neat):** 3386 (br), 3012 (m), 2920 (m), 1607 (s), 1510 (s), 1301 (m), 1247 (s), 1175 (m), 1061 (m), 1033 (m), 989 (m), 842 (m); **<sup>1</sup>H NMR (400 MHz, CDCl<sub>3</sub>):** δ 7.23 (d, *J* = 8.3 Hz, 2H), 6.87 (d, *J* = 8.6 Hz, 2H), 6.54 (d, *J* = 11.6 Hz, 1H), 5.92 (ddd, *J* = 18.0, 10.5, 5.6 Hz, 1H), 5.63 (dd, *J* = 11.6, 8.7 Hz, 1H), 5.30 (ddd, *J* = 17.4, 1.5, 1.5 Hz, 1H), 5.15 (ddd, *J* = 10.5, 1.5, 1.5 Hz, 1H), 4.30-4.23 (m, 1H), 3.94-3.84 (m, 2H), 3.82 (s, 3H), 2.10-2.00 (m, 2H), 1.57 (br s, 1H), 1.44-1.35 (m, 2H); **<sup>13</sup>C NMR (100 MHz, CDCl<sub>3</sub>):** δ 159.1, 138.4, 132.0, 130.3, 130.1, 129.5, 115.8, 114.0, 76.0, 72.3, 68.0, 55.5, 41.3, 40.8; **HRMS (ESI<sup>+</sup>) [M+H]<sup>+</sup>** calcd for C<sub>16</sub>H<sub>21</sub>O<sub>3</sub>: 261.1490, found: 261.1498; [α]<sub>D</sub><sup>20</sup> = + 71.1 (c = 0.375, CHCl<sub>3</sub>) for an enantiomerically enriched sample of 97:3 er (94% ee). Enantiomeric purity was determined by HPLC analysis in comparison with authentic racemic material (OD column, 98/2 hexanes/*i*-PrOH, 1.0 mL/min, 254 nm; t<sub>r</sub> (major enantiomer) = 26.01 min, t<sub>r</sub> (minor enantiomer) = 37.67 min.

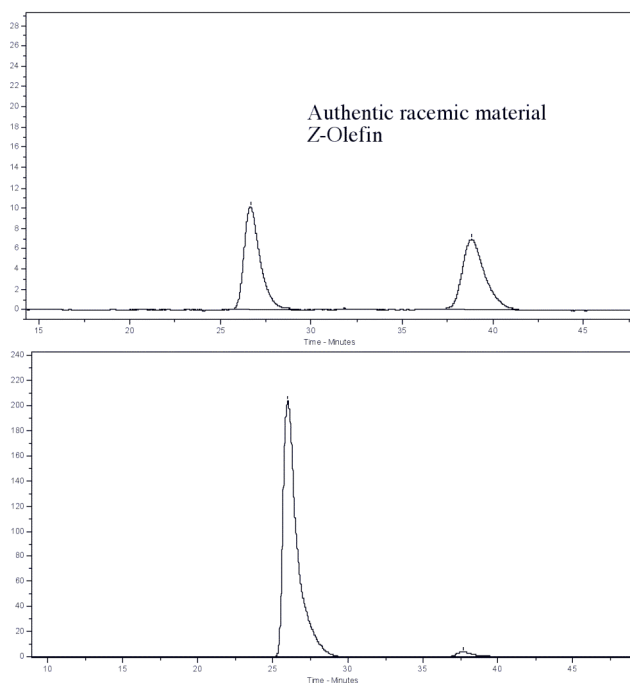

| # | time (min) | area   | area % | # | time (min) | area     | area % |
|---|------------|--------|--------|---|------------|----------|--------|
| 1 | 26.66      | 613163 | 50.661 | 1 | 26.01      | 21382090 | 97.319 |
| 2 | 38.82      | 597167 | 49.339 | 2 | 37.67      | 589118   | 2.681  |

***tert*-Butyldimethyl((2*S*,4*R*,6*R*)-2-*Z*-(4-(trifluoromethyl)styryl)-6-vinyltetrahydro-2*H*-pyran-4-yloxy)silane (6c) (Table 2, entry 2).** Following the previously mentioned procedure, oxabicyclo **4** (10.0 mg, 41.6 μmol) was treated with (1 mol %) of *in situ*-generated **5b** (20.0 μL, 0.02 M, 0.40 μmol, neat) and *p*-trifluoromethylstyrene (12.0 μL, 83.2 μmol, 2.0 equiv); the mixture was allowed to stir for 1.0 h. The resulting oil was purified by silica gel chromatography

(50:1 hexanes:diethyl ether) to afford **6c** (11.2 mg, 30.0  $\mu$ mol, 67.0% yield) as colorless oil. **IR** (**neat**): 2951 (s), 2928 (s), 2856 (s), 1471 (m), 1377 (m), 1254 (m), 1069 (s), 910 (m), 837 (m), 775 (m); **<sup>1</sup>H NMR (400 MHz, CDCl<sub>3</sub>)**:  $\delta$  7.60 (d,  $J$  = 8.3 Hz, 2H), 7.40 (d,  $J$  = 8.2 Hz, 2H), 6.61 (d,  $J$  = 11.6 Hz, 1H), 5.90 (ddd,  $J$  = 17.2, 10.6, 5.8 Hz, 1H), 5.82 (dd,  $J$  = 11.7, 8.6 Hz, 1H), 5.29 (ddd,  $J$  = 17.3, 1.4, 1.4 Hz, 1H), 5.15 (ddd,  $J$  = 10.6, 1.3, 1.3 Hz, 1H), 4.19-4.11 (m, 1H), 3.92-3.86 (m, 1H), 3.81-3.75 (m, 1H), 1.92-1.84 (m, 2H), 1.50-1.40 (m, 2H), 0.90 (s, 9H), 0.06 (s, 3H), 0.05 (s, 3H); **<sup>13</sup>C NMR (100 MHz, CDCl<sub>3</sub>)**:  $\delta$  140.6, 138.5, 134.0, 131.0, 129.4 (q,  $J_{\text{CF}}$  = 33.2 Hz), 129.2, 126.1 (q,  $J_{\text{CF}}$  = 271.9 Hz), 125.5 (q,  $J_{\text{CF}}$  = 3.7 Hz), 115.8, 76.4, 72.1, 68.4, 41.6, 41.3, 26.1, 18.3, -4.29, -4.32; **<sup>19</sup>F NMR (376 MHz, CDCl<sub>3</sub>)**:  $\delta$  -63.00; **HRMS (ESI<sup>+</sup>) [M+H]<sup>+</sup>** calcd for C<sub>22</sub>H<sub>32</sub>F<sub>3</sub>O<sub>2</sub>Si: 413.2123, found: 413.2121;  $[\alpha]_{\text{D}}^{20}$  +32.8 ( $c$  = 0.5, CHCl<sub>3</sub>) for an enantiomerically enriched sample of 98:2 er (96% ee). Enantiomeric purity was determined by analysis of HPLC of the corresponding alcohol after removal of the silyl group, in comparison with authentic racemic material.

**(2S,4R,6R)-2-Z-(4-(Trifluoromethyl)styryl)-6-vinyltetrahydro-2H-pyran-4-ol**. Following the aforementioned procedure, pyran **6c** was desilylated. **IR** (**neat**): 3378 (br), 3019 (m), 2921 (m), 1616 (m), 1427 (m), 1323 (s), 1163 (s), 1122 (s), 1065 (s), 988 (m), 854 (m); **<sup>1</sup>H NMR (400 MHz, CDCl<sub>3</sub>)**:  $\delta$  7.60 (d,  $J$  = 8.2 Hz, 1H), 7.42 (dd,  $J$  = 7.6, 1.4 Hz, 1H), 7.30-7.25 (m, 1H), 7.17-7.12 (m, 1H), 6.63 (d,  $J$  = 11.8 Hz, 1H), 5.91 (ddd,  $J$  = 17.2, 10.6, 5.6 Hz, 1H), 5.82 (dd,  $J$  = 11.7, 8.6 Hz, 1H), 5.30 (ddd,  $J$  = 17.2, 1.5, 1.5 Hz, 1H), 5.16 (ddd,  $J$  = 10.6, 1.5, 1.5 Hz, 1H), 4.10-4.00 (m, 1H), 3.90-3.80 (m, 1H), 3.78-3.72 (m, 1H), 1.88-1.83 (m, 2H), 1.48-1.43 (m, 1H), 1.40-1.35 (m, 1H), 0.87 (s, 9H), 0.04 (s, 6H); **<sup>13</sup>C NMR (100 MHz, CDCl<sub>3</sub>)**:  $\delta$  140.5, 138.2, 133.7, 131.1, 129.4 (q,  $J_{\text{CF}}$  = 32.5 Hz), 129.2, 125.5 (q,  $J_{\text{CF}}$  = 271.9 Hz), 123.0 (q,  $J_{\text{CF}}$  = 3.8 Hz), 116.0, 76.2, 72.1, 68.0, 41.1, 40.8; **HRMS (ESI<sup>+</sup>) [M+H]<sup>+</sup>** calcd for C<sub>16</sub>H<sub>18</sub>F<sub>3</sub>O<sub>2</sub>: 299.1258, found: 299.1248;  $[\alpha]_{\text{D}}^{20}$  +64.5 ( $c$  = 0.375, CHCl<sub>3</sub>) for an enantiomerically enriched sample of 98:2 er (96% ee). Enantiomeric purity was determined by HPLC analysis in comparison with authentic racemic material (OD column, 99/1 hexanes/*i*-PrOH, 1.0 mL/min, 254 nm;  $t_{\text{r}}$  (major enantiomer) = 37.36 min,  $t_{\text{r}}$  (minor enantiomer) = 33.76 min.

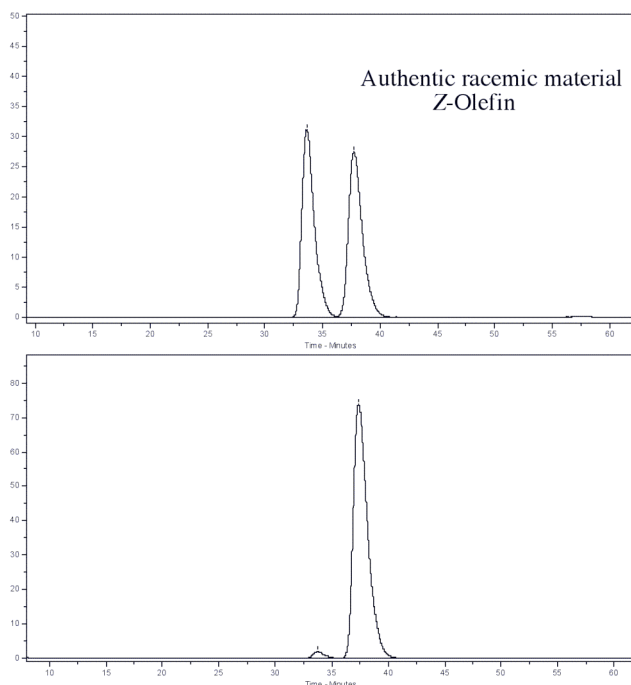

| # | time (min) | area    | area % | # | time (min) | area    | Area % |
|---|------------|---------|--------|---|------------|---------|--------|
| 1 | 33.65      | 2344791 | 50.054 | 1 | 33.76      | 138982  | 2.092  |
| 2 | 37.71      | 2339704 | 49.946 | 2 | 37.36      | 6505922 | 97.908 |

**((2*S*,4*R*,6*R*)-2-*Z*-(2-Bromostyryl)-6-vinyltetrahydro-2*H*-pyran-4-yloxy)(*tert*-butyl)dimethylsilane (6d) (Table 2, entry 3).** Following the general procedure described previously, oxabicyclo **4** (10.0 mg, 41.6  $\mu$ mol) was treated with *in situ*-generated complex **5b** (40.0  $\mu$ L, 0.02 M, 0.80  $\mu$ mol, neat) and *o*-bromostyrene (52.0  $\mu$ L, 416  $\mu$ mol, 10.0 equiv); the mixture was allowed to stir for 1.0 hour. The resulting oil was purified by silica gel chromatography (50:1 hexanes:diethyl ether) to afford **6d** (8.9 mg, 21.0  $\mu$ mol, 50.0% yield) as colorless oil. **IR (neat):** 3019 (s), 2927 (s), 2856 (s), 1470 (m), 1376 (m), 1254 (m), 1070 (s), 910 (m), 837 (m), 773 (m), 746(m), 730 (m) **<sup>1</sup>H NMR (400 MHz CDCl<sub>3</sub>):**  $\delta$  7.60 (d, *J* = 8.2 Hz, 1H), 7.40 (dd, *J* = 8.0, 1.4 Hz, 1H), 7.30-7.25 (m, 1H), 7.17-7.12 (m, 1H), 6.63 (d, *J* = 11.5 Hz, 1H), 5.90 (ddd, *J* = 17.2, 10.6, 5.6 Hz, 1H), 5.80 (dd, *J* = 11.5, 8.6 Hz, 1H), 5.30 (ddd, *J* = 17.2, 1.4, 1.4 Hz, 1H), 5.14 (ddd, *J* = 10.6, 1.5, 1.5 Hz, 1H), 4.10- 4.00 (m, 1H), 3.86-3.80 (m, 1H), 3.78-3.72 (m, 1H), 1.88-1.83 (m, 2H), 1.47-1.43 (m, 1H), 1.40-1.36 (m, 1H), 0.87 (s, 9H), 0.04 (s, 6H); **<sup>13</sup>C NMR (100 MHz, CDCl<sub>3</sub>):** 138.7, 137.2, 133.0, 132.8, 131.6, 131.0, 129.1, 127.3, 124.2, 115.6, 76.3, 72.3, 68.5, 41.6, 41.3, 26.1, 18.3, -4.3; **HRMS (ESI<sup>+</sup>) [M+H]<sup>+</sup>** calcd for C<sub>21</sub>H<sub>32</sub> Br O<sub>2</sub>Si: 423.1353, found: 423.1349;  $[\alpha]_D^{20}$  +43.7 (c = 0.375, CHCl<sub>3</sub>) for an enantiomerically enriched sample of >98:<2 er (>98% ee). Enantiomeric purity was determined by analysis of HPLC of the corresponding alcohol after removal of the silyl group, in comparison with authentic racemic material.

**(2*S*,4*R*,6*R*)-2-*Z*-(2-Bromostyryl)-6-vinyltetrahydro-2*H*-pyran-4-ol.** Following the aforementioned procedure, pyran **6d** was desilylated. **IR (neat):** 3360 (br), 3019 (m), 2920 (m),



2853 (m), 1468 (m), 1362 (m), 1302 (m), 1065 (m), 988 (m), 926 (m), 768 (m); **<sup>1</sup>H NMR (400 MHz, CDCl<sub>3</sub>)**: δ 7.58 (dd, *J* = 8.0, 1.0 Hz, 1H), 7.39 (dd, *J* = 7.6, 1.6 Hz, 1H), 7.30-7.24 (m, 1H), 7.17-7.12 (m, 1H), 6.63 (d, *J* = 11.5 Hz, 1H), 5.91 (ddd, *J* = 17.3, 10.6, 5.6 Hz, 1H), 5.82 (dd, *J* = 11.4, 8.8 Hz, 1H), 5.29 (ddd, *J* = 17.2, 1.5, 1.5 Hz, 1H), 5.16 (ddd, *J* = 10.6, 1.4, 1.4 Hz, 1H), 4.12-4.05 (m, 1H), 3.88-3.76 (m, 2H), 1.99-1.85 (m, 2H), 1.55 (br s, 1H), 1.42-1.32 (m, 2H); **<sup>13</sup>C NMR (100 MHz, CDCl<sub>3</sub>)**: 138.4, 137.1, 133.0, 132.7, 131.7, 130.7, 129.2, 127.3, 124.1, 115.8, 76.0, 72.2, 68.0, 41.1, 40.7; **HRMS (ESI<sup>+</sup>) [M+H]<sup>+</sup>** calcd for C<sub>15</sub>H<sub>18</sub>BrO<sub>2</sub>: 309.0490, found: 309.0496; [α]<sub>D</sub><sup>20</sup> +45.9 (c = 0.375, CHCl<sub>3</sub>) for an enantiomerically enriched sample of >98:<2 er (>98% ee). Enantiomeric purity was determined by HPLC analysis in comparison with authentic racemic material (OD column, 99/1 hexanes/*i*-PrOH, 1.0 mL/min, 254 nm; t<sub>r</sub> (major enantiomer) = 53.35 min, t<sub>r</sub> (minor enantiomer) = 46.14 min.

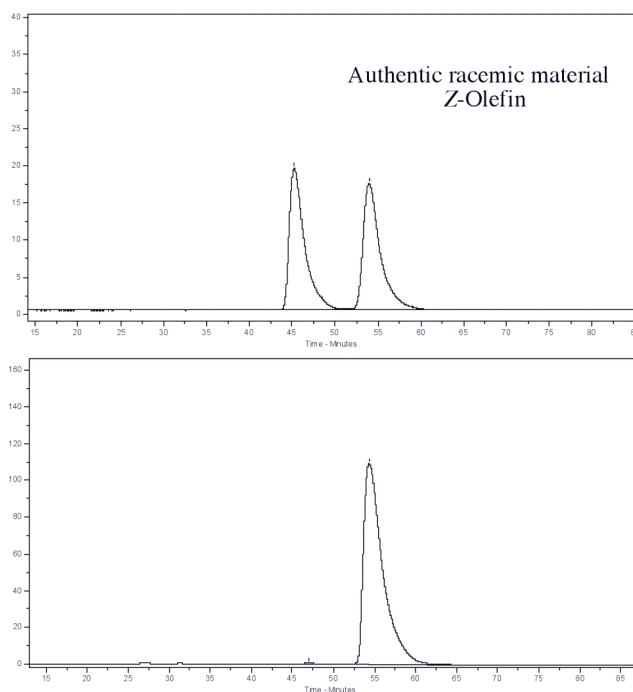

| # | time (min) | area    | area % | # | time (min) | area    | area % |
|---|------------|---------|--------|---|------------|---------|--------|
| 1 | 45.27      | 2391163 | 49.785 | 1 | 46.14      | 34040   | 0.484  |
| 2 | 53.93      | 2411786 | 50.215 | 2 | 53.35      | 6993783 | 99.516 |

***tert*-butyldimethyl((2*S*,4*R*,6*R*)-2-*Z*-(2-methylstyryl)-6-vinyltetrahydro-2*H*-pyran-4-yloxy)silane (6e) (Table 2, entry 4).** Following the general procedure described previously, oxabicyclo **4** (10.0 mg, 41.6 μmol) was treated with *in situ*-generated complex **5b** (40.0 μL, 0.02 M, 0.80 μmol, neat) and *o*-methylstyrene (54.0 μL, 416 μmol, 10.0 equiv), the mixture was allowed to stir for 1.0 h. The resulting oil was purified by silica gel chromatography (50:1 hexanes:diethyl ether) to afford **6e** (8.2 mg, 23.0 μmol, 54.0% yield) as colorless oil. **IR (neat)**: 2950 (s), 2927 (s), 2856 (s), 1471 (m), 1377 (m), 1253 (m), 1069 (s), 910 (m), 836 (m), 774 (m), 740(m), 715 (m); **<sup>1</sup>H NMR (400 MHz, CDCl<sub>3</sub>)**: δ 7.24-7.12 (m, 4H), 6.60 (d, *J* = 11.6 Hz, 1H), 5.90 (ddd, *J* = 17.1, 10.5, 5.8 Hz, 1H), 5.74 (dd, *J* = 11.5, 8.8 Hz, 1H), 5.30 (ddd, *J* = 17.2, 1.4,

1.4 Hz, 1H), 5.11 (ddd,  $J = 10.6, 1.3, 1.3$  Hz, 1H), 4.10-4.01 (m, 1H), 3.82-3.77 (m, 1H), 3.73 (ddd,  $J = 15.4, 10.8, 4.6$  Hz, 1H), 2.26 (s, 3H), 1.81-1.75 (m, 2H), 1.44-1.35 (m, 2H), 0.85 (s, 9H), 0.02 (s, 6H);  $^{13}\text{C}$  NMR (100 MHz,  $\text{CDCl}_3$ ):  $\delta$  139.0, 136.7, 136.3, 132.2, 131.0, 130.1, 129.2, 127.7, 125.7, 115.6, 76.2, 72.5, 68.5, 41.8, 41.3, 26.1, 20.2, 18.3, -4.3; HRMS ( $\text{ESI}^+$ )  $[\text{M}+\text{H}]^+$  calcd for  $\text{C}_{22}\text{H}_{35}\text{O}_2\text{Si}$ : 359.2406, found: 359.2393;  $[\alpha]_{\text{D}}^{20} +40.1$  ( $c = 0.375$ ,  $\text{CHCl}_3$ ) for an enantiomerically enriched sample of 99:1 er (98% ee). Enantiomeric purity was determined by HPLC analysis of the corresponding alcohol after removal of the silyl group, in comparison with authentic racemic material.

**(2*S*,4*R*,6*R*)-2-*Z*-(2-Methylstyryl)-6-vinyltetrahydro-2*H*-pyran-4-ol.** Following the previous procedure, pyran **6e** was desilylated. IR (neat): 3380 (br), 2941 (m), 2920 (m), 2854 (m), 1486 (m), 1361 (m), 1301 (m), 1063 (m), 988 (m), 925 (m), 793 (m);  $^1\text{H}$  NMR (400 MHz,  $\text{CDCl}_3$ ):  $\delta$  7.23-7.12 (m, 4H), 6.60 (d,  $J = 11.5$  Hz, 1H), 5.90 (ddd,  $J = 17.3, 10.7, 5.7$  Hz, 1H), 5.75 (dd,  $J = 11.6, 8.9$  Hz, 1H), 5.26 (ddd,  $J = 17.2, 1.4, 1.4$  Hz, 1H), 5.13 (ddd,  $J = 10.5, 1.4, 1.4$  Hz, 1H), 4.13-4.06 (m, 1H), 3.85-3.74 (m, 2H), 2.26 (s, 3H), 1.98-1.88 (m, 2H), 1.58 (br s, 1H), 1.39-1.30 (m, 2H);  $^{13}\text{C}$  NMR (100 MHz,  $\text{CDCl}_3$ ): 138.5, 137.0, 136.1, 132.0, 131.0, 130.1, 129.1, 127.7, 125.8, 115.7, 76.0, 72.4, 68.0, 41.3, 40.7, 20.1; HRMS ( $\text{ESI}^+$ )  $[\text{M}+\text{H}]^+$  calcd for  $\text{C}_{16}\text{H}_{21}\text{O}_2$ : 245.1542, found: 245.1537;  $[\alpha]_{\text{D}}^{20} +45.9$  ( $c = 0.375$ ,  $\text{CHCl}_3$ ) for an enantiomerically enriched sample of 99:1 er (98% ee). Enantiomeric purity was determined by HPLC analysis in comparison with authentic racemic material (OD column, 97/3 hexanes/*i*-PrOH, 0.2 mL/min, 254 nm;  $t_{\text{r}}$  (major enantiomer) = 75.93 min,  $t_{\text{r}}$  (minor enantiomer) = 69.90 min.

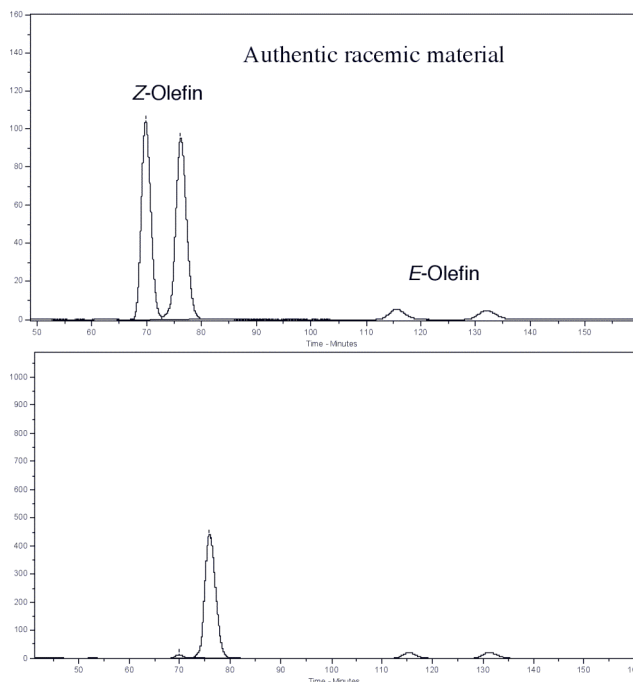

| # | time (min) | area     | area (%) | # | time (min) | area     | area % |
|---|------------|----------|----------|---|------------|----------|--------|
| 1 | 69.81      | 12734510 | 48.795   | 1 | 69.90      | 283472   | 1.046  |
| 2 | 76.22      | 13363450 | 51.205   | 2 | 75.93      | 26811780 | 98.954 |

**(tert-Butyldimethyl((2*S*,4*S*,6*R*)-2-*Z*-styryl-6-vinyltetrahydro-2*H*-pyran-4-yloxy)silane (7a)** (Table 3, entry 1). Following the general procedure described before, oxabicycle **7** (10.0 mg, 41.6  $\mu$ mol) in C<sub>6</sub>H<sub>6</sub> (380  $\mu$ L) was treated with *in situ*-generated complex **5b** (40.0  $\mu$ L, 0.02 M, 0.80  $\mu$ mol; final substrate concentration = 0.1 M) and styrene (48.0  $\mu$ L, 416  $\mu$ mol, 10.0 equiv.); the mixture was allowed to stir for 1.0 hour. The resulting oil was purified by silica gel chromatography (50:1 hexanes:diethyl ether) to afford **7a** (12.0 mg, 35.0  $\mu$ mol, 83.0% yield) as colorless oil. **IR (neat)**: 3016 (w), 2950 (s), 2927 (s), 2855 (s), 1252 (m), 1092 (s), 1053 (s), 910 (m), 828 (s), 772 (m), 690 (m); **<sup>1</sup>H NMR (400 MHz, CDCl<sub>3</sub>)**:  $\delta$  7.34-7.23 (m, 5H), 6.48 (d, *J* = 12.0 Hz, 1H), 5.87 (ddd, *J* = 17.3, 10.6, 5.8 Hz, 1H), 5.70 (dd, *J* = 11.9, 8.8 Hz, 1H), 5.24 (ddd, *J* = 17.4, 1.6, 1.6 Hz, 1H), 5.10 (ddd, *J* = 10.6, 1.6, 1.6 Hz, 1H), 5.00-4.94 (m, 1H), 4.39-4.32 (m, 1H), 4.28-4.24 (m, 1H), 1.76-1.52 (m, 4H), 0.90 (s, 9H), 0.06 (s, 6H); **<sup>13</sup>C NMR (100 MHz, CDCl<sub>3</sub>)**:  $\delta$  139.5, 137.1, 133.2, 130.2, 129.1, 128.4, 127.3, 115.1, 72.3, 68.8, 65.2, 39.0, 38.9, 26.1, 18.3, -4.6, -4.7; **HRMS (ESI<sup>+</sup>) [M+H]<sup>+</sup>** calcd for C<sub>21</sub>H<sub>33</sub>O<sub>2</sub>Si: 345.2249, found: 345.2260;  $[\alpha]_D^{20}$  -1.6 (*c* = 0.375, CHCl<sub>3</sub>) for an enantiomerically enriched sample of 97:3 er (94% ee). Enantiomeric purity was determined by analysis of HPLC of the corresponding alcohol after removal of the silyl group, in comparison with authentic racemic material.

**(2*S*,4*S*,6*R*)-2-*Z*-Styryl-6-vinyltetrahydro-2*H*-pyran-4-ol**. Following the procedure described above, pyran **7a** was desilylated. **IR (neat)**: 3419 (br), 3016 (w), 2917 (m), 1415 (w), 1308 (m), 1053 (s), 962 (s), 775 (s), 699 (s); **<sup>1</sup>H NMR (400 MHz, CDCl<sub>3</sub>)**:  $\delta$  7.36-7.23 (m, 5H), 6.57 (d, *J* = 11.8 Hz, 1H), 5.90 (ddd, *J* = 17.2, 10.6, 5.7 Hz, 1H), 5.67 (dd, *J* = 11.7, 8.8 Hz, 1H), 5.29 (ddd, *J* = 17.4, 1.5, 1.5 Hz, 1H), 5.13 (ddd, *J* = 10.5, 1.3, 1.3 Hz, 1H), 4.90-4.80 (m, 1H), 4.42-4.35 (m, 1H), 4.34-4.30 (m, 1H), 1.78-1.72 (m, 2H), 1.71-1.61 (m, 2H), 1.42 (br s, 1H); **<sup>13</sup>C NMR (100 MHz, CDCl<sub>3</sub>)**:  $\delta$  139.2, 137.0, 132.4, 132.1, 129.1, 128.5, 127.5, 115.5, 72.1, 68.4, 64.8, 38.6, 38.2; **HRMS (ESI<sup>+</sup>) [M+H]<sup>+</sup>** calcd for C<sub>15</sub>H<sub>19</sub>O<sub>2</sub>: 231.1385, found: 231.1395;  $[\alpha]_D^{20}$  +52.8 (*c* = 0.375, CHCl<sub>3</sub>) for an enantiomerically enriched sample of 94% ee. Enantiomeric purity was determined by HPLC analysis in comparison with authentic racemic material (OD column, 98/2 hexanes/*i*-PrOH, 1.0 mL/min, 254 nm; *t<sub>r</sub>* (major enantiomer) = 23.04 min, *t<sub>r</sub>* (minor enantiomer) = 20.74 min.

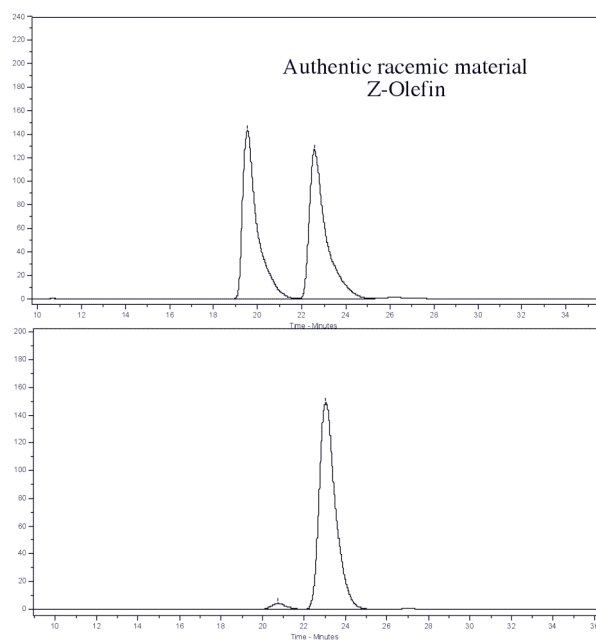

| # | time (min) | area    | area % | # | time (min) | area     | area % |
|---|------------|---------|--------|---|------------|----------|--------|
| 1 | 19.55      | 6621971 | 49.882 | 1 | 20.74      | 372236   | 2.620  |
| 2 | 22.56      | 6653320 | 50.118 | 2 | 23.04      | 13834140 | 97.380 |

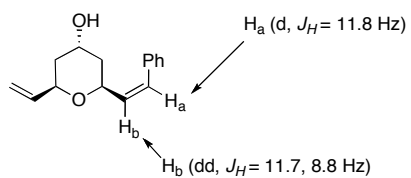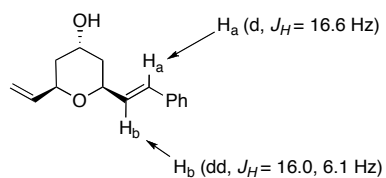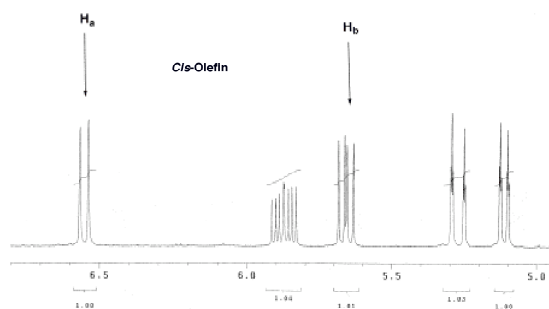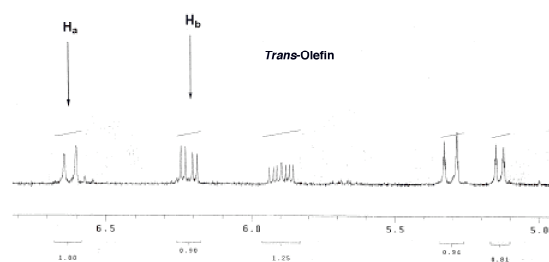

***tert*-Butyl((2*S*,4*S*,6*R*)-2-*Z*-(4-methoxystyryl)-6-vinyltetrahydro-2*H*-pyran-4-**

**yoxy)dimethylsilane (7b)** (Table 3, entry 2). Following the aforementioned procedure, oxabicyclo **7** (10.0 mg, 41.6  $\mu$ mol) in C<sub>6</sub>H<sub>6</sub> (150  $\mu$ L) was treated with *in situ*-generated **5b** (60.0  $\mu$ L, 0.02 M, 1.20  $\mu$ mol, final substrate concentration = 0.2 M) and *p*-methoxystyrene (60.0  $\mu$ L, 416  $\mu$ mol, 10.0 equiv), and the mixture was allowed to stir for 1.0 hour. The resulting oil was purified by silica gel chromatography (50:1 hexanes:diethyl ether) to afford **7b** (12.5 mg, 33.4  $\mu$ mol, 80.0% yield) as colorless oil. **IR (neat)**: 2951 (s), 2928 (s), 2855 (s), 1463 (m), 1360 (m), 1249 (m), 1092 (s), 912 (m), 836 (m), 774 (m); **<sup>1</sup>H NMR (400 MHz, CDCl<sub>3</sub>)**:  $\delta$  7.23 (d, *J* = 8.7 Hz, 2H), 6.85 (d, *J* = 8.8 Hz, 2H), 6.42 (d, *J* = 12.0 Hz, 1H), 5.90 (ddd, *J* = 17.2, 10.6, 5.6 Hz, 1H), 5.60 (dd, *J* = 11.8, 8.6 Hz, 1H), 5.24 (ddd, *J* = 17.4, 1.5, 1.5 Hz, 1H), 5.10 (ddd, *J* = 10.6, 1.5, 1.5 Hz, 1H), 5.00-4.93 (m, 1H), 4.40-4.33 (m, 1H), 4.30-4.24 (m, 1H), 3.81 (s, 3H), 1.76-1.55 (m, 4H), 0.92 (s, 9H), 0.07 (s, 6H); **<sup>13</sup>C NMR (100 MHz, CDCl<sub>3</sub>)**:  $\delta$  159.0, 139.6, 132.0, 130.4, 130.0, 129.8, 115.1, 114.0, 72.3, 69.0, 65.2, 55.5, 39.0, 39.0, 26.0, 18.3, -4.6, -4.7; **HRMS (ESI<sup>+</sup>) [M+H]<sup>+</sup>** calcd for C<sub>22</sub>H<sub>35</sub>O<sub>3</sub>Si: 375.2355, found: 375.2370;  $[\alpha]_D^{20}$  + 33.2 (*c* = 0.375, CHCl<sub>3</sub>) for an enantiomerically enriched sample of 92% ee. Enantiomeric purity was determined by analysis of HPLC of the corresponding alcohol after removal of the silyl group, in comparison with authentic racemic material.

**(2*S*,4*S*,6*R*)-2-*Z*-(4-Methoxystyryl)-6-vinyltetrahydro-2*H*-pyran-4-ol**. Following the procedure described before, oxabicyclo **7b** was desilylated. **IR (neat)**: 3427 (br), 3081 (w), 3012 (m), 2921 (m), 1607 (s), 1511 (s), 1303 (m), 1250 (s), 1176 (m), 1091 (m), 1034 (m), 963 (m), 840 (m); **<sup>1</sup>H NMR (400 MHz, CDCl<sub>3</sub>)**:  $\delta$  7.28 (d, *J* = 8.7 Hz, 2H), 6.87 (d, *J* = 8.7 Hz, 2H), 6.51 (d, *J* = 11.5 Hz, 1H), 5.90 (ddd, *J* = 17.3, 10.6, 5.8 Hz, 1H), 5.60 (dd, *J* = 11.6, 8.6 Hz, 1H), 5.30 (ddd, *J* = 17.2, 1.5, 1.5 Hz, 1H), 5.13 (ddd, *J* = 10.6, 1.4, 1.4 Hz, 1H), 4.80-4.71 (m, 1H), 4.43-4.36 (m, 1H), 4.34-4.30 (m, 1H), 3.81 (s, 3H), 1.78-1.72 (m, 2H), 1.70-1.61 (m, 2H), 1.56 (br s, 1H); **<sup>13</sup>C NMR (100 MHz, CDCl<sub>3</sub>)**:  $\delta$  159.1, 139.2, 131.8, 130.7, 130.4, 129.7, 115.5, 114.0, 72.1, 68.5, 65.0, 55.5, 38.6, 38.2; **HRMS (ESI<sup>+</sup>) [M+H]<sup>+</sup>** calcd for C<sub>16</sub>H<sub>21</sub>O<sub>3</sub>: 261.1490, found: 261.1490;  $[\alpha]_D^{20}$  +73.3 (*c* = 0.375, CHCl<sub>3</sub>) for an enantiomerically enriched sample of 96:4 er (92% ee). Enantiomeric purity was determined by HPLC analysis in comparison with authentic racemic material (OD column, 98/2 hexanes/*i*-PrOH, 1.0 mL/min, 254 nm; *t<sub>r</sub>* (major enantiomer) = 26.00 min, *t<sub>r</sub>* (minor enantiomer) = 32.34 min.

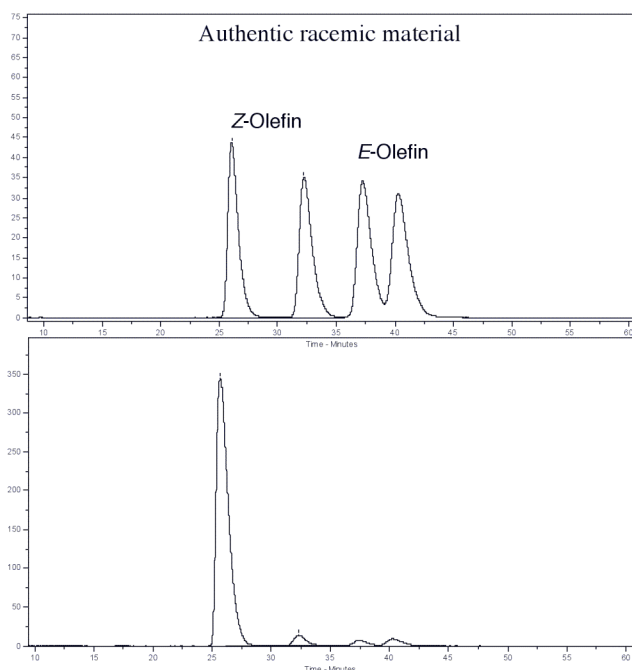

| # | time (min) | area    | area % | # | time (min) | area     | area % |
|---|------------|---------|--------|---|------------|----------|--------|
| 1 | 26.07      | 2750359 | 50.155 | 1 | 26.00      | 24555790 | 96.095 |
| 2 | 32.26      | 2733389 | 49.845 | 2 | 32.34      | 997822   | 3.905  |

***tert*-Butyldimethyl((2*S*,4*S*,6*R*)-2-*Z*-(4-(trifluoromethyl)styryl)-6-vinyltetrahydro-2*H*-pyran-4-yloxy)silane (7c) (Table 3, entry 3).** Following the general procedure **B**, oxabicyclo **7** (10.0 mg, 41.6  $\mu$ mol) was treated with *in situ*-generated complex **5b** (40.0  $\mu$ L, 0.02 M, 0.80  $\mu$ mol, neat) and *p*-trifluoromethylstyrene (61.0  $\mu$ L, 416  $\mu$ mol, 10.0 equiv); the mixture was allowed to stir for 1.0 hour. The resulting oil was purified by silica gel chromatography (50:1 hexanes:diethyl ether) to afford **7c** (14.0 mg, 34.0  $\mu$ mol, 81.0% yield) as a colorless oil. **IR** (neat): 2952 (s), 2928 (s), 2857 (s), 1463 (m), 1361 (m), 1165 (s), 1126 (s), 1064 (s), 853 (m); **<sup>1</sup>H NMR** (400 MHz, CDCl<sub>3</sub>):  $\delta$  7.56 (d, *J* = 8.4 Hz, 2H), 7.40 (d, *J* = 8.2 Hz, 2H), 6.51 (d, *J* = 12.0 Hz, 1H), 5.90 (ddd, *J* = 17.2, 10.5, 5.6 Hz, 1H), 5.80 (dd, *J* = 11.8, 8.8 Hz, 1H), 5.24 (ddd, *J* = 17.3, 1.5, 1.5 Hz, 1H), 5.10 (ddd, *J* = 10.6, 1.5, 1.5 Hz, 1H), 4.92-4.82 (m, 1H), 4.38-4.31 (m, 1H), 4.26-4.22 (m, 1H), 1.67-1.62 (m, 2H), 1.61-1.51 (m, 2H), 0.90 (s, 9H), 0.036 (s, 3H), 0.034 (s, 3H); **<sup>13</sup>C NMR** (100 MHz, CDCl<sub>3</sub>):  $\delta$  140.6, 139.3, 135.2, 129.4 (q, *J*<sub>CF</sub> = 32.73 Hz), 129.2, 129.1, 124.4 (q, *J*<sub>CF</sub> = 271.9 Hz), 125.3 (q, *J*<sub>CF</sub> = 3.60 Hz), 115.2, 72.3, 69.0, 65.0, 39.0, 38.8, 26.0, 18.1, -4.6, -4.8. **<sup>19</sup>F NMR** (376 MHz, CDCl<sub>3</sub>):  $\delta$  -63.01; **HRMS** (ESI<sup>+</sup>) [**M**+**H**]<sup>+</sup> calcd for C<sub>22</sub>H<sub>32</sub>F<sub>3</sub>O<sub>2</sub>Si: 413.2123, found: 413.2120; [ $\alpha$ ]<sub>D</sub><sup>20</sup> +23.6 (c = 0.375, CHCl<sub>3</sub>) for an enantiomerically enriched sample of 98:2 er (96% ee). Enantiomeric purity was determined by analysis of HPLC of the corresponding alcohol after removal of the silyl group, in comparison with authentic racemic material.

**(2*S*,4*S*,6*R*)-2-*Z*-(4-(Trifluoromethyl)styryl)-6-vinyltetrahydro-2*H*-pyran-4-ol.** Following the procedure **C**, pyran **7c** was desilylated. **IR** (neat): 3385 (br), 2953 (m), 2923 (m), 1616 (m),

1402 (m), 1324 (s), 1164 (s), 1123 (s), 1064 (s), 989 (m), 862 (m); **<sup>1</sup>H NMR (400 MHz, CDCl<sub>3</sub>):**  $\delta$  7.60 (d,  $J$  = 8.4 Hz, 2H), 7.44 (d,  $J$  = 8.4 Hz, 2H), 6.60 (d,  $J$  = 11.8 Hz, 1H), 5.90 (ddd,  $J$  = 17.2, 10.6, 5.6 Hz, 1H), 5.80 (dd,  $J$  = 11.7, 8.7 Hz, 1H), 5.30 (ddd,  $J$  = 17.3, 1.5, 1.5 Hz, 1H), 5.14 (ddd,  $J$  = 10.5, 1.3, 1.3 Hz, 1H), 4.80-4.70 (m, 1H), 4.41-4.35 (m, 1H), 4.33-4.30 (m, 1H), 1.80-1.72 (m, 2H), 1.70-1.62 (m, 2H); **<sup>13</sup>C NMR (100 MHz, CDCl<sub>3</sub>):**  $\delta$  140.4, 139.0, 134.3, 131.0, 129.6 (q,  $J_{CF}$  = 32.30 Hz), 129.2, 125.8 (q,  $J_{CF}$  = 271.9 Hz), 125.5 (q,  $J_{CF}$  = 3.6 Hz), 116.0, 72.1, 68.2, 64.6, 38.4, 38.2; **HRMS (ESI<sup>+</sup>) [M+H]<sup>+</sup>** calcd for C<sub>16</sub>H<sub>18</sub>F<sub>3</sub>O<sub>2</sub>: 299.1258, found: 299.1245;  $[\alpha]_D^{20}$  +96.2 ( $c$  = 0.375, CHCl<sub>3</sub>) for an enantiomerically enriched sample of 98:2 er (96% ee). Enantiomeric purity was determined by HPLC analysis in comparison with authentic racemic material (OD column, 99.5/0.5 hexanes/*i*-PrOH, 1.0 mL/min, 254 nm;  $t_r$  (major enantiomer) = 40.87 min,  $t_r$  (minor enantiomer) = 49.27 min.

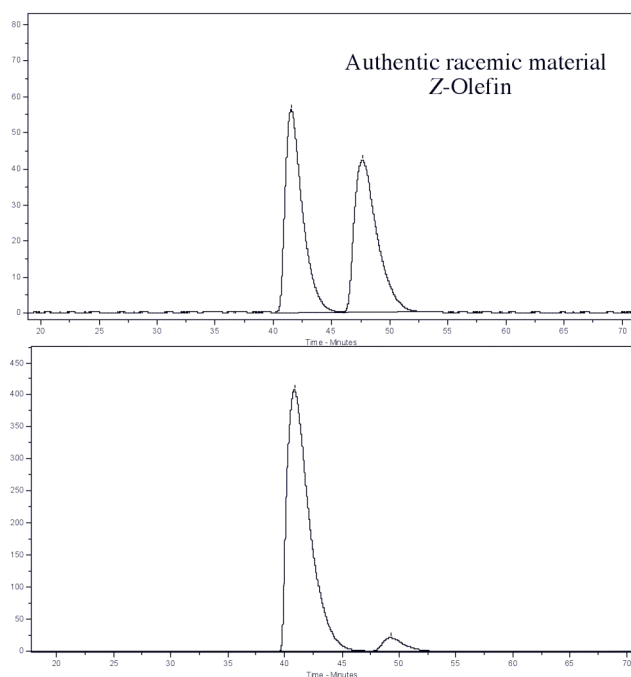

| # | time (h) | area    | area % | # | time (h) | area     | area % |
|---|----------|---------|--------|---|----------|----------|--------|
| 1 | 41.58    | 5815648 | 50.116 | 1 | 40.87    | 24201800 | 98.368 |
| 2 | 47.61    | 5788734 | 49.884 | 2 | 49.27    | 401629   | 1.632  |

**(2*S*,4*R*,6*R*)-4-(Benzyloxy)-2-*Z*-styryl-6-vinyltetrahydro-2*H*-pyran (8) (Table 3, entry 4).** Following the general procedure described above, oxabicyclo **10** (10.0 mg, 46.0  $\mu$ mol) in C<sub>6</sub>H<sub>6</sub> (360  $\mu$ L) was treated with *in situ*-generated complex **5b** (100.0  $\mu$ L, 0.02 M, 2.10  $\mu$ mol, final substrate concentration = 0.1 M) and styrene (53.0  $\mu$ L, 0.460 mmol, 10.0 equiv), the mixture was allowed to stir for 1.0 hour at 60 °C. The resulting oil was purified by silica gel chromatography (30:1 hexanes:diethyl ether) to afford **8a** (11.2 mg, 34.4  $\mu$ mol, 75.0% yield) as colorless oil. **IR (neat):** 2944 (m), 2855 (m), 1494 (w), 1452 (w), 1358 (m), 1066 (s), 986 (m), 736(s), 697 (s); **<sup>1</sup>H NMR (400 MHz, CDCl<sub>3</sub>):**  $\delta$  7.37-7.24 (m, 10H), 6.60 (d,  $J$  = 11.6 Hz, 1H), 5.93 (ddd,  $J$  = 17.2, 10.7, 5.7 Hz, 1H), 5.73 (dd,  $J$  = 11.5, 8.7 Hz, 1H), 5.29 (ddd,  $J$  = 17.2, 1.5, 1.5 Hz, 1H), 5.15

(ddd,  $J = 10.6, 1.3, 1.3$  Hz, 1H), 4.58 (s, 2H), 4.28-4.21 (m, 1H), 3.92-3.85 (m, 1H), 3.62-3.48 (m, 1H), 2.15-2.10 (m, 2H), 1.51-1.42 (m, 2H);  $^{13}\text{C}$  NMR (100 MHz,  $\text{CDCl}_3$ ):  $\delta$  138.7, 138.6, 137.0, 132.2, 131.9, 129.0, 128.7, 128.5, 127.8, 127.5, 127.2, 115.7, 76.2, 74.2, 72.3, 69.8, 38.2, 37.8; HRMS (ESI<sup>+</sup>)  $[\text{M}+\text{H}]^+$  calcd for  $\text{C}_{22}\text{H}_{25}\text{O}_2$ : 321.1854, found: 321.1847;  $[\alpha]_{\text{D}}^{20} +12.1$  ( $c = 0.5$ ,  $\text{CHCl}_3$ ) for an enantiomerically enriched sample of 92:8 er (84% ee). Enantiomeric purity was determined by HPLC analysis in comparison with authentic racemic material (OJ-H column, 99.8/0.2 hexanes/*i*-PrOH, 1.0 mL/min, 254 nm;  $t_{\text{r}}$  (major enantiomer) = 99.57 min,  $t_{\text{r}}$  (minor enantiomer) = 80.51 min.

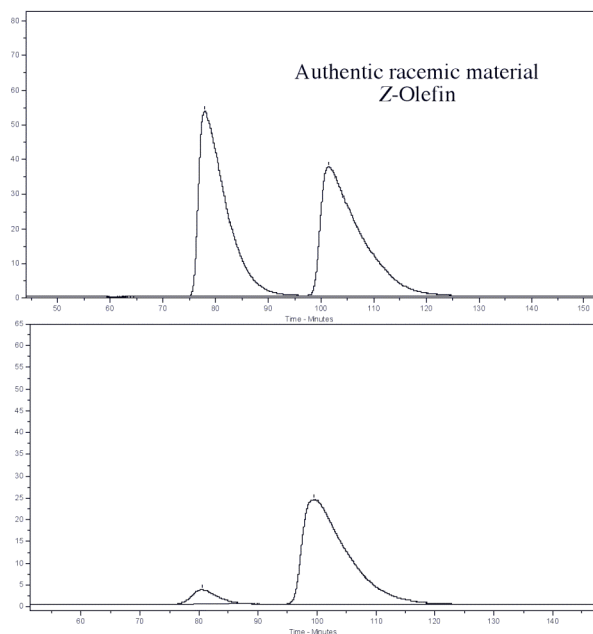

| # | time (min) | area     | area % | # | time (min) | area     | area % |
|---|------------|----------|--------|---|------------|----------|--------|
| 1 | 77.93      | 19191690 | 49.926 | 1 | 80.51      | 1050521  | 7.695  |
| 2 | 101.38     | 19248600 | 50.074 | 2 | 99.57      | 12601580 | 92.305 |



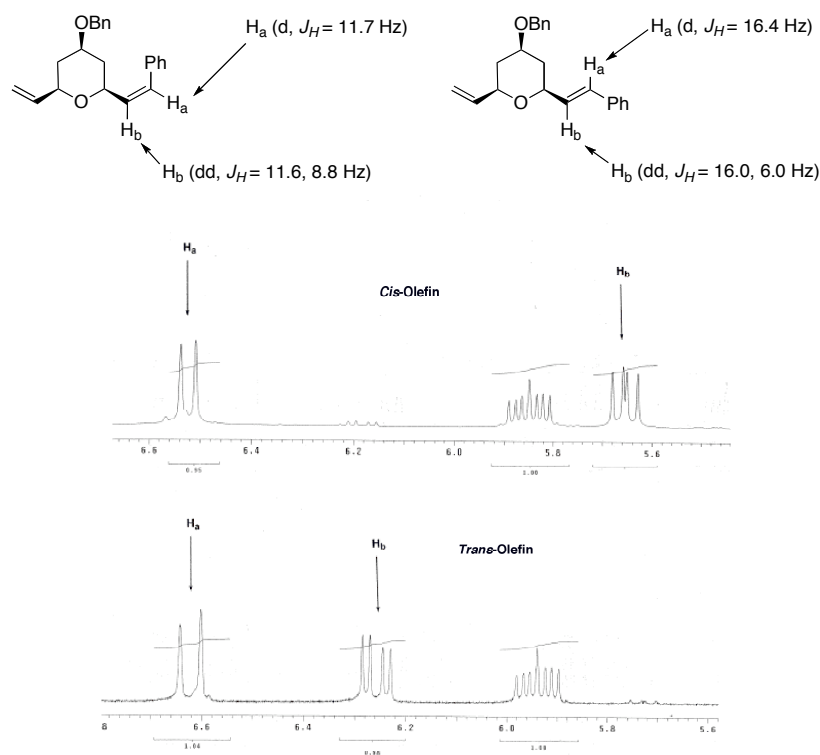

**(2*S*,4*S*,6*R*)-4-(Benzyloxy)-2-*Z*-styryl-6-vinyltetrahydro-2*H*-pyran (9) (Table 3, entry 9).**

Following the general procedure described before, oxabicyclo (10.0 mg, 46.0  $\mu$ mol) in C<sub>6</sub>H<sub>6</sub> (420  $\mu$ L) was treated with *in situ*-generated **5b** (40.0  $\mu$ L, 0.02 M, 0.80  $\mu$ mol, final substrate concentration = 0.1 M) and styrene (53.0  $\mu$ L, 0.460 mmol, 10.0 equiv); the mixture was allowed to stir for 1.0 hour. The resulting oil was purified by silica gel chromatography (30:1 hexanes:diethyl ether) to afford **9a** (12.0 mg, 37.5  $\mu$ mol, 80.0% yield) as colorless oil. **IR** (neat): 3061 (w), 3025 (w), 2919 (w), 2855 (w), 1494 (w), 1452 (w), 1337 (m), 1052(s), 989 (m), 695 (s); **<sup>1</sup>H NMR** (CDCl<sub>3</sub>, 400 MHz):  $\delta$  7.36-7.23 (m, 10H), 6.52 (d,  $J$  = 11.7 Hz, 1H), 5.86 (ddd,  $J$  = 17.0, 10.7, 5.7 Hz, 1H), 5.69 (dd,  $J$  = 11.8, 8.6 Hz, 1H), 5.25 (ddd,  $J$  = 17.4, 1.4, 1.4 Hz, 1H), 5.10 (ddd,  $J$  = 10.7, 1.5, 1.5 Hz, 1H), 4.92-4.86 (m, 1H), 4.53 (dd,  $J$  = 15.5, 11.9 Hz, 2H), 4.38-4.32 (m, 1H), 3.94-3.90 (m, 1H), 2.01-1.91 (m, 2H), 1.62-1.54 (m, 2H); **<sup>13</sup>C NMR** (100 MHz, CDCl<sub>3</sub>):  $\delta$  139.3, 139.0, 137.1, 132.8, 131.3, 129.1, 128.6, 128.5, 127.7, 127.4, 126.4, 115.4, 72.7, 71.5, 70.3, 69.1, 35.5, 35.3; **HRMS** (ESI<sup>+</sup>) [**M**+**H**]<sup>+</sup> calcd for C<sub>22</sub>H<sub>25</sub>O<sub>2</sub>: 321.1854, found: 321.1863; [ $\alpha$ ]<sub>D</sub><sup>20</sup> +52.8 (c = 0.375, CHCl<sub>3</sub>) for an enantiomerically enriched sample of 86 % ee. Enantiomeric purity was determined by HPLC analysis in comparison with authentic racemic material (OJ-H column, 99.8/0.2 hexanes/*i*-PrOH, 1.0 mL/min, 254 nm;  $t_r$  (major enantiomer) = 51.69 min,  $t_r$  (minor enantiomer) = 82.77 min.

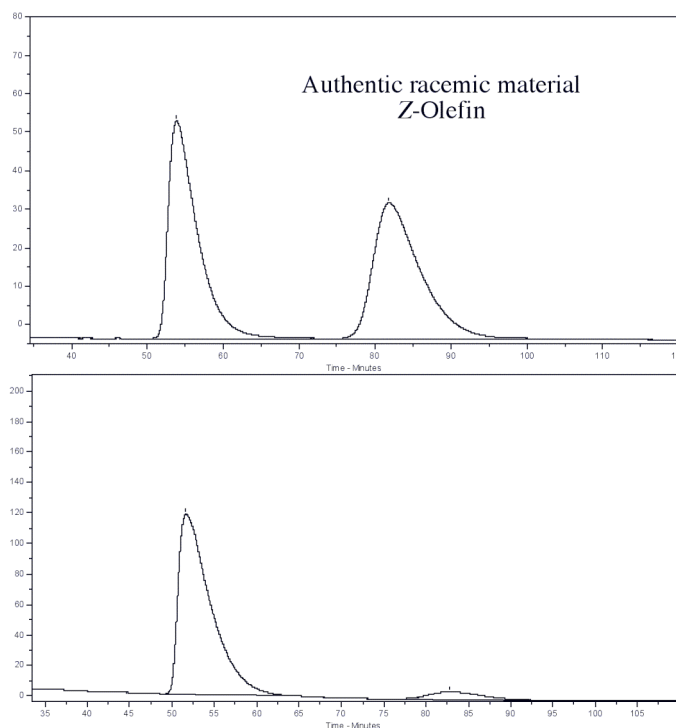

| # | time (min) | area     | area % | # | time (min) | area     | area % |
|---|------------|----------|--------|---|------------|----------|--------|
| 1 | 53.90      | 15189940 | 49.649 | 1 | 51.69      | 31343360 | 94.147 |
| 2 | 81.78      | 15404440 | 50.351 | 2 | 82.77      | 1948478  | 5.853  |

((*Z*)-3-((2*S*,4*R*,6*R*)-4-(Benzyloxy)-6-vinyltetrahydro-2*H*-pyran-2-*Z*-yl)allyloxy)(*tert*-butyl)dimethylsilane (**11**) (eq 2). Following the previously described procedure, oxabicyclo **10** (10.0 mg, 46.0  $\mu$ mol) in  $C_6H_6$  (360  $\mu$ L) was treated with *in situ*-generated complex **5b** (100.0  $\mu$ L, 0.02 M, 2.10  $\mu$ mol, final substrate concentration = 0.1 M) and allylsilyl ether (80.0 mg, 460  $\mu$ mol, 10.0 equiv.), the mixture was allowed to stir for 1.0 hour. The resulting oil was purified by silica gel chromatography (50:1 hexanes:diethyl ether) to afford **11** (8.1 mg, 21.0  $\mu$ mol, 45.0% yield) as colorless oil. **IR** (neat): 2951 (m), 2928 (m), 2883 (m), 2856 (m), 1496 (w), 1462 (w), 1408 (w), 1356 (m), 1254 (m), 1072 (s), 986 (m), 735 (s), 697 (s);  **$^1H$  NMR** (400 MHz,  $CDCl_3$ ):  $\delta$  7.38-7.24 (m, 5H), 5.86 (ddd,  $J$  = 18.8, 10.6, 5.4 Hz, 1H), 5.63-5.56 (m, 1H), 5.51-5.45 (m, 1H), 5.24 (ddd,  $J$  = 17.3, 1.4, 1.4 Hz, 1H), 5.11 (ddd,  $J$  = 10.6, 1.4, 1.4 Hz, 1H), 4.57 (s, 2H), 4.25 (ddd,  $J$  = 5.9, 1.4, 1.4 Hz, 2H), 4.21-4.14 (m, 1H), 3.90-3.81 (m, 1H), 3.62-3.55 (m, 1H), 2.12-2.06 (m, 1H), 2.04-1.97 (m, 1H), 1.42-1.29 (m, 2H), 0.88 (s, 9H), 0.05 (s, 6H);  **$^{13}C$  NMR** (100 MHz,  $CDCl_3$ ):  $\delta$  139.1, 138.5, 132.0, 131.0, 128.7, 127.8, 127.6, 115.6, 76.4, 74.5, 72.5, 69.8, 60.1, 38.3, 37.7, 26.2, 18.3, -4.90, -4.97; **HRMS** (ESI<sup>+</sup>) [ $M+H$ ]<sup>+</sup> calcd for  $C_{23}H_{37}O_3Si$  : 389.2512, found: 389.2506;  $[\alpha]_D^{20}$  -3.2 ( $c$  = 0.375,  $CHCl_3$ ) for an enantiomerically enriched sample of 88:12 er (76% ee). Enantiomeric purity was determined by HPLC analysis in comparison with authentic racemic material of the corresponding alcohol.

**(Z)-3-((2S,4R,6R)-4-(Benzyloxy)-6-vinyltetrahydro-2H-pyran-2-yl)prop-2-en-1-ol.** Following the procedure described before, pyran **10** was desilylated. **IR** (neat): 3405 (br), 3026 (m), 2920 (m), 2851 (m), 1454 (m), 1356 (m), 1302 (m), 1069 (m), 1009 (m), 926 (m), 737 (m); **<sup>1</sup>H NMR** (400 MHz, CDCl<sub>3</sub>): δ 7.37-7.23 (m, 5H), 5.86 (ddd, *J* = 20.8, 10.6, 5.7 Hz, 1H), 5.80-5.73 (m, 1H), 5.61-5.55 (m, 1H), 5.25 (ddd, *J* = 17.3, 1.3, 1.3 Hz, 1H), 5.13 (ddd, *J* = 10.6, 1.3, 1.3 Hz, 1H), 4.57 (s, 2H), 4.27-4.11 (m, 3H), 3.92-3.85 (m, 1H), 3.63 (ddd, *J* = 20.0, 11.1, 4.6 Hz, 1H), 2.14-2.10 (m, 1H), 2.07-2.04 (m, 1H), 2.03-2.00 (m, 1H), 1.46-1.32 (m, 2H); **<sup>13</sup>C NMR** (100 MHz, CDCl<sub>3</sub>): δ 138.6, 138.2, 132.4, 132.0, 128.7, 128.0, 127.8, 116.0, 76.7, 74.3, 72.5, 70.0, 59.3, 38.3, 37.7; **HRMS** (ESI<sup>+</sup>) [*M*+*H*]<sup>+</sup> calcd for C<sub>17</sub>H<sub>23</sub>O<sub>3</sub>: 275.1647, found: 275.1654; [*α*]<sub>D</sub><sup>20</sup> +7.5 (*c* = 0.375, CHCl<sub>3</sub>) for an enantiomerically enriched sample of 88:12 er (76% ee). Enantiomeric purity was determined by chiral HPLC analysis in comparison with authentic racemic material (OD column, 98.0/2.0 hexanes/*i*-PrOH, 1.0 mL/min, 220 nm; *t*<sub>r</sub> (major enantiomer) = 36.66 min, *t*<sub>r</sub> (minor enantiomer) = 31.03 min

**Proof of Z-selectivity:** The stereochemistry of the product olefin was established through NOESY experiments, as summarized below. For the complete spectrum, see page 42–43 of Supporting Information Part B.

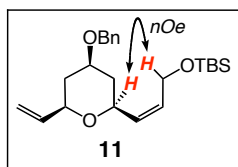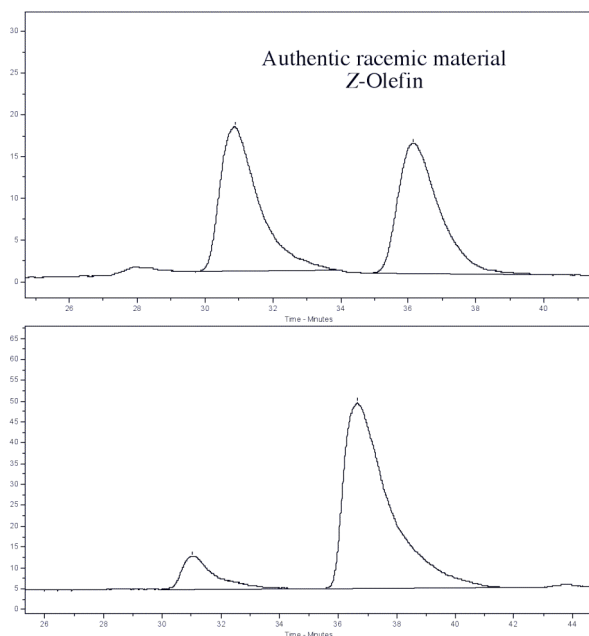

| # | time (min) | area    | area % | # | time (min) | area    | area % |
|---|------------|---------|--------|---|------------|---------|--------|
| 1 | 30.88      | 1406152 | 51.407 | 1 | 31.03      | 640265  | 11.734 |
| 2 | 36.15      | 1329180 | 48.593 | 2 | 36.66      | 4816096 | 88.266 |

■ **For additional examples of previously reported Z-selective olefin metathesis processes,** see: (a) Randall, M. L.; Tallarico, J. A.; Snapper, M. L. *J. Am. Chem. Soc.* **1995**, *117*, 9610–9611. (b) Tallarico, J. A.; Randall, M. L.; Snapper, M. L. *Tetrahedron*, **1997**, *vol. 53*, 16511–16520. (c) Kang, B.; Kim, D.; Do, Y.; Chang, S. *Organic Letters*, **2003**, *vol. 5*, 3041–3043. (d) Kang, B.; Lee, J. M.; Kwak, J.; Lee, Y. S.; Chang, S. *J. Org. Chem.* **2004**, *69*, 7661–7664. (e) Sashuk, V.; Samojlowicz, C.; Szadkowska, A.; Grela, K. *Chem. Commun.*, **2008**, 2468–2470.

■ **Proof of Absolute Stereochemistry.** The identity of the major enantiomer from Mo-catalyzed enantioselective ROCM was established through X-ray crystallography (see below). The stereochemical assignments for other pyran products obtained in this study are by inference.

X-ray structure obtained for *p*-bromobenzoate derived from ROCM product **7a** Table 3)

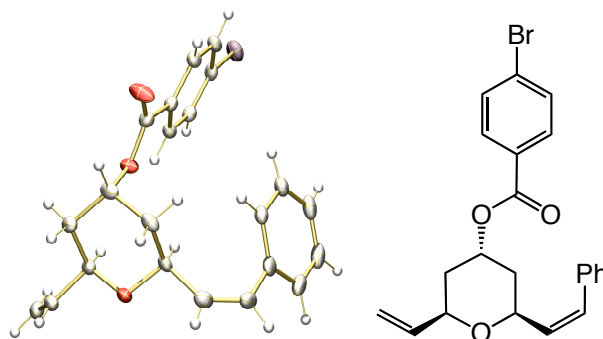

**Table 1. Crystal data and structure refinement**

|                                 |                                                  |                 |
|---------------------------------|--------------------------------------------------|-----------------|
| Identification code             | C <sub>22</sub> H <sub>21</sub> BrO <sub>3</sub> |                 |
| Empirical formula               | C <sub>22</sub> H <sub>21</sub> BrO <sub>3</sub> |                 |
| Formula weight                  | 413.30                                           |                 |
| Temperature                     | 100(2) K                                         |                 |
| Wavelength                      | 0.71073 Å                                        |                 |
| Crystal system                  | Monoclinic                                       |                 |
| Space group                     | P 2 <sub>1</sub>                                 |                 |
| Unit cell dimensions            | a = 5.916(4) Å                                   | α = 90°.        |
|                                 | b = 7.695(5) Å                                   | β = 92.434(8)°. |
|                                 | c = 21.225(13) Å                                 | γ = 90°.        |
| Volume                          | 965.4(10) Å <sup>3</sup>                         |                 |
| Z                               | 2                                                |                 |
| Density (calculated)            | 1.422 Mg/m <sup>3</sup>                          |                 |
| Absorption coefficient          | 2.147 mm <sup>-1</sup>                           |                 |
| F(000)                          | 424                                              |                 |
| Crystal size                    | 0.10 x 0.05 x 0.02 mm <sup>3</sup>               |                 |
| Theta range for data collection | 2.88 to 28.27°.                                  |                 |
| Index ranges                    | -7 ≤ h ≤ 7, -10 ≤ k ≤ 10, -27 ≤ l ≤ 28           |                 |
| Reflections collected           | 11087                                            |                 |
| Independent reflections         | 4556 [R(int) = 0.0441]                           |                 |
| Completeness to theta = 28.27°  | 98.0 %                                           |                 |
| Absorption correction           | Semi-empirical from equivalents                  |                 |
| Max. and min. transmission      | 0.9583 and 0.8139                                |                 |
| Refinement method               | Full-matrix least-squares on F <sup>2</sup>      |                 |

|                                      |                                       |
|--------------------------------------|---------------------------------------|
| Data / restraints / parameters       | 4556 / 22 / 298                       |
| Goodness-of-fit on $F^2$             | 1.011                                 |
| Final R indices [ $I > 2\sigma(I)$ ] | $R_1 = 0.0378$ , $wR_2 = 0.0899$      |
| R indices (all data)                 | $R_1 = 0.0438$ , $wR_2 = 0.0931$      |
| Absolute structure parameter         | 0.019(9)                              |
| Extinction coefficient               | 0                                     |
| Largest diff. peak and hole          | 0.940 and -0.453 e. $\text{\AA}^{-3}$ |

**Table 2. Atomic coordinates ( $\times 10^4$ ) and equivalent isotropic displacement parameters ( $\approx 2 \times 10^3$ ). U(eq) is defined as one third of the trace of the orthogonalized  $U_{ij}$  tensor**

|       | x        | y        | z       | U(eq) |
|-------|----------|----------|---------|-------|
| Br(1) | 718(1)   | 4254(1)  | 9901(1) | 33(1) |
| O(1)  | -1394(3) | 1162(3)  | 6940(1) | 22(1) |
| O(2)  | -4850(4) | 740(4)   | 7317(1) | 36(1) |
| O(3)  | 2232(3)  | -861(4)  | 5917(1) | 20(1) |
| C(1)  | -347(5)  | 3244(4)  | 9131(1) | 22(1) |
| C(2)  | 1010(5)  | 3322(4)  | 8616(2) | 22(1) |
| C(3)  | 226(5)   | 2634(4)  | 8049(1) | 21(1) |
| C(4)  | -1930(5) | 1886(4)  | 7998(1) | 18(1) |
| C(5)  | -3269(6) | 1826(5)  | 8520(2) | 22(1) |
| C(6)  | -2476(5) | 2497(4)  | 9094(1) | 24(1) |
| C(7)  | -2914(5) | 1195(4)  | 7393(1) | 21(1) |
| C(8)  | -2048(6) | 254(5)   | 6354(2) | 23(1) |
| C(9)  | -889(5)  | 1196(5)  | 5831(1) | 23(1) |
| C(10) | 1673(5)  | 942(4)   | 5874(1) | 20(1) |
| C(11) | 1350(5)  | -1654(4) | 6473(1) | 20(1) |
| C(12) | -1227(6) | -1596(5) | 6423(2) | 24(1) |
| C(13) | 2742(5)  | 1610(4)  | 5296(1) | 23(1) |
| C(14) | 4140(5)  | 2921(5)  | 5280(2) | 27(1) |
| C(15) | 2299(6)  | -3451(4) | 6504(2) | 27(1) |
| C(16) | 3280(6)  | -4208(4) | 7002(2) | 29(1) |
| C(17) | 3576(6)  | -3494(4) | 7647(2) | 26(1) |
| C(18) | 5589(6)  | -3791(5) | 7998(2) | 32(1) |
| C(19) | 5930(7)  | -3144(6) | 8603(2) | 34(1) |
| C(20) | 4220(6)  | -2222(5) | 8879(2) | 33(1) |
| C(21) | 2208(6)  | -1928(5) | 8541(2) | 28(1) |
| C(22) | 1884(5)  | -2550(4) | 7938(2) | 23(1) |

**Table 3. Bond lengths [ $\approx$ ] and angles [ $\infty$ ]**

|              |           |
|--------------|-----------|
| Br(1)-C(1)   | 1.893(3)  |
| O(1)-C(7)    | 1.344(3)  |
| O(1)-C(8)    | 1.464(4)  |
| O(2)-C(7)    | 1.202(4)  |
| O(3)-C(10)   | 1.428(4)  |
| O(3)-C(11)   | 1.446(3)  |
| C(1)-C(6)    | 1.384(5)  |
| C(1)-C(2)    | 1.384(4)  |
| C(2)-C(3)    | 1.377(4)  |
| C(2)-H(2)    | 0.916(18) |
| C(3)-C(4)    | 1.399(4)  |
| C(3)-H(3)    | 0.944(18) |
| C(4)-C(5)    | 1.391(4)  |
| C(4)-C(7)    | 1.485(4)  |
| C(5)-C(6)    | 1.385(5)  |
| C(5)-H(5)    | 0.940(19) |
| C(6)-H(6)    | 0.941(18) |
| C(8)-C(12)   | 1.509(5)  |
| C(8)-C(9)    | 1.514(5)  |
| C(8)-H(8)    | 0.964(18) |
| C(9)-C(10)   | 1.527(4)  |
| C(9)-H(9A)   | 0.980(19) |
| C(9)-H(9B)   | 0.978(18) |
| C(10)-C(13)  | 1.496(4)  |
| C(10)-H(10)  | 0.987(18) |
| C(11)-C(15)  | 1.493(5)  |
| C(11)-C(12)  | 1.525(5)  |
| C(11)-H(11)  | 0.994(18) |
| C(12)-H(12A) | 0.982(18) |
| C(12)-H(12B) | 0.974(18) |
| C(13)-C(14)  | 1.306(5)  |
| C(13)-H(13)  | 0.945(18) |
| C(14)-H(14A) | 0.951(18) |
| C(14)-H(14B) | 0.949(19) |



|             |           |
|-------------|-----------|
| C(15)-C(16) | 1.319(5)  |
| C(15)-H(15) | 0.925(18) |
| C(16)-C(17) | 1.480(5)  |
| C(16)-H(16) | 0.918(18) |
| C(17)-C(18) | 1.396(5)  |
| C(17)-C(22) | 1.401(5)  |
| C(18)-C(19) | 1.385(6)  |
| C(18)-H(18) | 0.965(19) |
| C(19)-C(20) | 1.385(6)  |
| C(19)-H(19) | 0.957(19) |
| C(20)-C(21) | 1.382(5)  |
| C(20)-H(20) | 0.949(19) |
| C(21)-C(22) | 1.373(5)  |
| C(21)-H(21) | 0.969(18) |
| C(22)-H(22) | 0.959(18) |

|                  |          |
|------------------|----------|
| C(7)-O(1)-C(8)   | 117.1(2) |
| C(10)-O(3)-C(11) | 111.8(2) |
| C(6)-C(1)-C(2)   | 122.0(3) |
| C(6)-C(1)-Br(1)  | 119.3(2) |
| C(2)-C(1)-Br(1)  | 118.7(2) |
| C(3)-C(2)-C(1)   | 119.2(3) |
| C(3)-C(2)-H(2)   | 116(2)   |
| C(1)-C(2)-H(2)   | 125(2)   |
| C(2)-C(3)-C(4)   | 119.9(3) |
| C(2)-C(3)-H(3)   | 124(2)   |
| C(4)-C(3)-H(3)   | 116(2)   |
| C(5)-C(4)-C(3)   | 120.0(3) |
| C(5)-C(4)-C(7)   | 117.5(3) |
| C(3)-C(4)-C(7)   | 122.5(3) |
| C(6)-C(5)-C(4)   | 120.3(3) |
| C(6)-C(5)-H(5)   | 123(2)   |
| C(4)-C(5)-H(5)   | 117(2)   |
| C(1)-C(6)-C(5)   | 118.6(3) |
| C(1)-C(6)-H(6)   | 117(2)   |
| C(5)-C(6)-H(6)   | 124(2)   |

|                     |           |
|---------------------|-----------|
| O(2)-C(7)-O(1)      | 124.1(3)  |
| O(2)-C(7)-C(4)      | 123.9(3)  |
| O(1)-C(7)-C(4)      | 112.0(2)  |
| O(1)-C(8)-C(12)     | 107.2(3)  |
| O(1)-C(8)-C(9)      | 106.5(3)  |
| C(12)-C(8)-C(9)     | 111.6(3)  |
| O(1)-C(8)-H(8)      | 109(2)    |
| C(12)-C(8)-H(8)     | 109(2)    |
| C(9)-C(8)-H(8)      | 114(2)    |
| C(8)-C(9)-C(10)     | 112.0(3)  |
| C(8)-C(9)-H(9A)     | 109(2)    |
| C(10)-C(9)-H(9A)    | 109(2)    |
| C(8)-C(9)-H(9B)     | 107(2)    |
| C(10)-C(9)-H(9B)    | 110(2)    |
| H(9A)-C(9)-H(9B)    | 110(3)    |
| O(3)-C(10)-C(13)    | 106.3(2)  |
| O(3)-C(10)-C(9)     | 110.8(3)  |
| C(13)-C(10)-C(9)    | 111.1(2)  |
| O(3)-C(10)-H(10)    | 113(2)    |
| C(13)-C(10)-H(10)   | 109(2)    |
| C(9)-C(10)-H(10)    | 107(2)    |
| O(3)-C(11)-C(15)    | 106.2(2)  |
| O(3)-C(11)-C(12)    | 109.0(2)  |
| C(15)-C(11)-C(12)   | 113.8(3)  |
| O(3)-C(11)-H(11)    | 107(2)    |
| C(15)-C(11)-H(11)   | 112(2)    |
| C(12)-C(11)-H(11)   | 108.2(17) |
| C(8)-C(12)-C(11)    | 110.5(3)  |
| C(8)-C(12)-H(12A)   | 113(2)    |
| C(11)-C(12)-H(12A)  | 106(2)    |
| C(8)-C(12)-H(12B)   | 110(2)    |
| C(11)-C(12)-H(12B)  | 111(2)    |
| H(12A)-C(12)-H(12B) | 106(3)    |
| C(14)-C(13)-C(10)   | 125.2(3)  |
| C(14)-C(13)-H(13)   | 121(2)    |
| C(10)-C(13)-H(13)   | 114(2)    |

|                     |          |
|---------------------|----------|
| C(13)-C(14)-H(14A)  | 124(2)   |
| C(13)-C(14)-H(14B)  | 125(2)   |
| H(14A)-C(14)-H(14B) | 111(3)   |
| C(16)-C(15)-C(11)   | 126.6(3) |
| C(16)-C(15)-H(15)   | 116(3)   |
| C(11)-C(15)-H(15)   | 117(3)   |
| C(15)-C(16)-C(17)   | 127.5(3) |
| C(15)-C(16)-H(16)   | 120(2)   |
| C(17)-C(16)-H(16)   | 113(2)   |
| C(18)-C(17)-C(22)   | 117.4(3) |
| C(18)-C(17)-C(16)   | 119.8(3) |
| C(22)-C(17)-C(16)   | 122.8(3) |
| C(19)-C(18)-C(17)   | 121.5(4) |
| C(19)-C(18)-H(18)   | 119(2)   |
| C(17)-C(18)-H(18)   | 120(2)   |
| C(18)-C(19)-C(20)   | 119.7(4) |
| C(18)-C(19)-H(19)   | 117(3)   |
| C(20)-C(19)-H(19)   | 123(3)   |
| C(21)-C(20)-C(19)   | 119.6(4) |
| C(21)-C(20)-H(20)   | 117(2)   |
| C(19)-C(20)-H(20)   | 123(2)   |
| C(22)-C(21)-C(20)   | 120.6(3) |
| C(22)-C(21)-H(21)   | 117(2)   |
| C(20)-C(21)-H(21)   | 121(2)   |
| C(21)-C(22)-C(17)   | 121.1(3) |
| C(21)-C(22)-H(22)   | 118(2)   |
| C(17)-C(22)-H(22)   | 121(2)   |

---

Symmetry transformations used to generate equivalent atoms:

**Table 4. Anisotropic displacement parameters ( $\approx 2 \times 10^3$ ). The anisotropic displacement factor exponent takes the form:  $-2\pi^2 [h^2 a^{*2} U^{11} + \dots + 2 h k a^* b^* U^{12}]$**

|       | $U^{11}$ | $U^{22}$ | $U^{33}$ | $U^{23}$ | $U^{13}$ | $U^{12}$ |
|-------|----------|----------|----------|----------|----------|----------|
| Br(1) | 44(1)    | 36(1)    | 18(1)    | -4(1)    | -3(1)    | -9(1)    |
| O(1)  | 15(1)    | 33(1)    | 19(1)    | -7(1)    | 0(1)     | -3(1)    |
| O(2)  | 19(1)    | 66(2)    | 24(1)    | -9(1)    | 2(1)     | -13(1)   |
| O(3)  | 22(1)    | 23(1)    | 16(1)    | 0(1)     | 4(1)     | 1(1)     |
| C(1)  | 29(2)    | 22(2)    | 15(1)    | -1(1)    | -5(1)    | 2(1)     |
| C(2)  | 20(2)    | 20(2)    | 25(2)    | 0(1)     | -2(1)    | 0(1)     |
| C(3)  | 20(2)    | 23(2)    | 20(2)    | 3(1)     | 3(1)     | 2(1)     |
| C(4)  | 17(1)    | 20(2)    | 19(1)    | 0(1)     | -1(1)    | 2(1)     |
| C(5)  | 24(2)    | 20(2)    | 22(2)    | 2(1)     | 3(1)     | 0(1)     |
| C(6)  | 26(2)    | 26(2)    | 19(1)    | 4(1)     | 5(1)     | 1(1)     |
| C(7)  | 20(2)    | 24(2)    | 21(2)    | 0(1)     | 0(1)     | 3(1)     |
| C(8)  | 18(2)    | 33(2)    | 16(2)    | -6(1)    | -2(1)    | -2(1)    |
| C(9)  | 19(2)    | 33(2)    | 18(1)    | 1(1)     | -3(1)    | 4(1)     |
| C(10) | 19(1)    | 24(2)    | 15(1)    | 0(1)     | 0(1)     | 2(1)     |
| C(11) | 23(2)    | 24(2)    | 13(1)    | 1(1)     | 2(1)     | -2(1)    |
| C(12) | 25(2)    | 31(2)    | 15(2)    | -3(1)    | 1(1)     | -8(1)    |
| C(13) | 22(2)    | 30(2)    | 17(1)    | 2(1)     | 2(1)     | 5(1)     |
| C(14) | 23(2)    | 31(2)    | 27(2)    | 8(1)     | 2(1)     | 6(1)     |
| C(15) | 31(2)    | 24(2)    | 26(2)    | -4(1)    | 7(1)     | -2(1)    |
| C(16) | 36(2)    | 18(2)    | 33(2)    | 3(1)     | 12(2)    | 3(1)     |
| C(17) | 28(2)    | 21(2)    | 30(2)    | 11(1)    | 4(1)     | -3(1)    |
| C(18) | 25(2)    | 27(2)    | 46(2)    | 16(2)    | 2(2)     | 2(1)     |
| C(19) | 31(2)    | 30(2)    | 41(2)    | 15(2)    | -11(2)   | -6(2)    |
| C(20) | 36(2)    | 33(2)    | 28(2)    | 13(2)    | -7(2)    | -11(2)   |
| C(21) | 31(2)    | 30(2)    | 22(2)    | 8(1)     | 2(1)     | -1(1)    |
| C(22) | 20(2)    | 26(2)    | 24(2)    | 8(1)     | 0(1)     | -1(1)    |

**Table 5. Hydrogen coordinates ( $\times 10^4$ ) and isotropic displacement parameters ( $\approx 2 \times 10^{-3}$ )**

|        | x         | y         | z        | U(eq) |
|--------|-----------|-----------|----------|-------|
| H(2)   | 2410(40)  | 3840(40)  | 8618(15) | 26    |
| H(3)   | 1070(50)  | 2620(50)  | 7682(12) | 25    |
| H(5)   | -4630(40) | 1200(50)  | 8474(18) | 27    |
| H(6)   | -3340(50) | 2570(50)  | 9454(12) | 28    |
| H(8)   | -3670(30) | 240(50)   | 6305(17) | 27    |
| H(9A)  | -1240(60) | 2440(30)  | 5853(17) | 28    |
| H(9B)  | -1510(50) | 720(50)   | 5433(11) | 28    |
| H(10)  | 2250(60)  | 1610(40)  | 6243(13) | 23    |
| H(11)  | 1870(50)  | -940(50)  | 6842(11) | 24    |
| H(12A) | -1680(60) | -2320(40) | 6059(13) | 28    |
| H(12B) | -1880(60) | -2140(50) | 6786(13) | 28    |
| H(13)  | 2360(60)  | 960(40)   | 4928(12) | 27    |
| H(14A) | 4550(60)  | 3620(40)  | 5637(13) | 32    |
| H(14B) | 4860(60)  | 3320(50)  | 4917(13) | 32    |
| H(15)  | 2180(60)  | -4110(50) | 6139(13) | 33    |
| H(16)  | 3970(50)  | -5270(30) | 6958(17) | 34    |
| H(18)  | 6790(50)  | -4440(50) | 7813(18) | 39    |
| H(19)  | 7330(50)  | -3430(60) | 8821(18) | 41    |
| H(20)  | 4410(60)  | -1640(50) | 9272(12) | 40    |
| H(21)  | 1060(50)  | -1160(40) | 8699(16) | 33    |
| H(22)  | 440(40)   | -2340(50) | 7728(15) | 28    |

**Table 6. Torsion angles [ $^{\circ}$ ]**

|                         |           |
|-------------------------|-----------|
| C(6)-C(1)-C(2)-C(3)     | -0.1(5)   |
| Br(1)-C(1)-C(2)-C(3)    | -178.2(2) |
| C(1)-C(2)-C(3)-C(4)     | 0.7(5)    |
| C(2)-C(3)-C(4)-C(5)     | -0.5(5)   |
| C(2)-C(3)-C(4)-C(7)     | 177.1(3)  |
| C(3)-C(4)-C(5)-C(6)     | -0.3(5)   |
| C(7)-C(4)-C(5)-C(6)     | -178.1(3) |
| C(2)-C(1)-C(6)-C(5)     | -0.7(5)   |
| Br(1)-C(1)-C(6)-C(5)    | 177.4(3)  |
| C(4)-C(5)-C(6)-C(1)     | 0.9(5)    |
| C(8)-O(1)-C(7)-O(2)     | -10.4(5)  |
| C(8)-O(1)-C(7)-C(4)     | 170.5(3)  |
| C(5)-C(4)-C(7)-O(2)     | 7.0(5)    |
| C(3)-C(4)-C(7)-O(2)     | -170.7(3) |
| C(5)-C(4)-C(7)-O(1)     | -173.8(3) |
| C(3)-C(4)-C(7)-O(1)     | 8.5(4)    |
| C(7)-O(1)-C(8)-C(12)    | -92.4(3)  |
| C(7)-O(1)-C(8)-C(9)     | 148.0(3)  |
| O(1)-C(8)-C(9)-C(10)    | 68.8(3)   |
| C(12)-C(8)-C(9)-C(10)   | -47.8(4)  |
| C(11)-O(3)-C(10)-C(13)  | 178.1(2)  |
| C(11)-O(3)-C(10)-C(9)   | -61.0(3)  |
| C(8)-C(9)-C(10)-O(3)    | 52.1(3)   |
| C(8)-C(9)-C(10)-C(13)   | 170.0(3)  |
| C(10)-O(3)-C(11)-C(15)  | -172.8(2) |
| C(10)-O(3)-C(11)-C(12)  | 64.2(3)   |
| O(1)-C(8)-C(12)-C(11)   | -65.2(3)  |
| C(9)-C(8)-C(12)-C(11)   | 51.1(3)   |
| O(3)-C(11)-C(12)-C(8)   | -58.3(3)  |
| C(15)-C(11)-C(12)-C(8)  | -176.6(3) |
| O(3)-C(10)-C(13)-C(14)  | -124.5(3) |
| C(9)-C(10)-C(13)-C(14)  | 114.9(4)  |
| O(3)-C(11)-C(15)-C(16)  | 131.6(3)  |
| C(12)-C(11)-C(15)-C(16) | -108.5(4) |

|                         |           |
|-------------------------|-----------|
| C(11)-C(15)-C(16)-C(17) | 3.0(6)    |
| C(15)-C(16)-C(17)-C(18) | -140.7(4) |
| C(15)-C(16)-C(17)-C(22) | 40.9(5)   |
| C(22)-C(17)-C(18)-C(19) | -1.6(5)   |
| C(16)-C(17)-C(18)-C(19) | 180.0(3)  |
| C(17)-C(18)-C(19)-C(20) | 1.9(5)    |
| C(18)-C(19)-C(20)-C(21) | -1.3(5)   |
| C(19)-C(20)-C(21)-C(22) | 0.4(5)    |
| C(20)-C(21)-C(22)-C(17) | -0.1(5)   |
| C(18)-C(17)-C(22)-C(21) | 0.7(5)    |
| C(16)-C(17)-C(22)-C(21) | 179.1(3)  |

---

Symmetry transformations used to generate equivalent atoms:
